# Supplementary material for: Silver(i) complexes containing heteroleptic diorganochalcogen(ii) ligands
Source: Royal Society of Chemistry journal article supplement (doi:10.1039/d2nj05472h), 2022-12-13
Supplement: d2nj05472h1.pdf [file d2nj05472h1.pdf]

**Electronic Supporting Information (ESI) for**

**Silver(I) complexes containing heteroleptic diorganochalcogen(II) ligands**

Roxana A. Butuza, Darius Dumitraş, Cosmina Bohan and Alexandra Pop\*

Corresponding author: Alexandra Pop

Supramolecular Organic and Organometallic Chemistry Centre,  
Chemistry Department, Faculty of Chemistry and Chemical Engineering,  
Babes-Bolyai University, RO-400028 Cluj-Napoca, Romania.

E-mail: [alexandra.m.pop@ubbcluj.ro](mailto:alexandra.m.pop@ubbcluj.ro); Tel: (+40) 264-593833.

## Contents

### Figures

|                                                                                                                 |    |
|-----------------------------------------------------------------------------------------------------------------|----|
| Figure S1. $^1\text{H}$ NMR spectra ( $\text{CDCl}_3$ , 400 MHz) of <b>1</b> , <b>3</b> and <b>5</b>            | S3 |
| Figure S2. $^1\text{H}$ NMR spectra ( $\text{CDCl}_3$ , 600 MHz) <b>3</b> and <b>7</b>                          | S3 |
| Figure S3. $^1\text{H}$ NMR spectra (acetone- $d_6$ , 600 MHz) of <b>8</b> , <b>9</b> , <b>10</b> and <b>11</b> | S4 |
| Figure S4. $^{77}\text{Se}$ NMR spectra ( $\text{CDCl}_3$ , 400 MHz) of <b>1</b> , <b>3</b> and <b>5</b>        | S4 |
| Figure S5. UV-Vis spectra of compounds <b>5</b> , <b>8</b> and <b>10</b>                                        | S5 |
| Figure S6. UV-Vis spectra of compounds <b>6</b> , <b>9</b> and <b>11</b>                                        | S5 |

|                                                                                            |    |
|--------------------------------------------------------------------------------------------|----|
| <b>X-ray diffraction crystallography</b>                                                   | S6 |
| Figure S7. Thermal ellipsoids representation at 50% probability of <b>6</b>                | S6 |
| Figure S8. Dimeric association in <b>6</b>                                                 | S6 |
| Figure S9. Best view of the supramolecular ladder-like chain of dimers in <b>5</b>         | S7 |
| Figure S10. Best view of the supramolecular chain of dimers in <b>6</b>                    | S7 |
| Table S1. Crystal data and details of data collection for <b>5</b> , <b>6</b> and <b>9</b> | S8 |

### NMR spectra

|                                                                                                                                                                                           |     |
|-------------------------------------------------------------------------------------------------------------------------------------------------------------------------------------------|-----|
| Figures S11-S13, $^1\text{H}$ , $^{13}\text{C}\{^1\text{H}\}$ and $^{77}\text{Se}\{^1\text{H}\}$ NMR spectra of <b>1</b>                                                                  | S9  |
| Figure S14, $^1\text{H}$ NMR spectrum of <b>2</b>                                                                                                                                         | S10 |
| Figures S15-S17, $^1\text{H}$ , $^{13}\text{C}\{^1\text{H}\}$ and $^{77}\text{Se}\{^1\text{H}\}$ NMR spectra of <b>3</b>                                                                  | S11 |
| Figure S18-S20, $^{21}\text{H}$ , $^{13}\text{C}\{^1\text{H}\}$ and $^{77}\text{Se}\{^1\text{H}\}$ NMR spectra of <b>5</b>                                                                | S12 |
| Figures S21-S22, $^1\text{H}$ and $^{13}\text{C}\{^1\text{H}\}$ NMR spectra of <b>6</b>                                                                                                   | S14 |
| Figure S23-26, $^1\text{H}$ , $^{13}\text{C}\{^1\text{H}\}$ , $^{77}\text{Se}\{^1\text{H}\}$ and $^{19}\text{F}\{^1\text{H}\}$ NMR spectrum of <b>7</b>                                   | S15 |
| Figures S27-S29, $^1\text{H}$ , $^{13}\text{C}\{^1\text{H}\}$ and $^{19}\text{F}\{^1\text{H}\}$ NMR spectra of <b>8</b>                                                                   | S17 |
| Figure S30-32, $^1\text{H}$ , $^{13}\text{C}\{^1\text{H}\}$ and $^{19}\text{F}\{^1\text{H}\}$ NMR spectrum of <b>9</b>                                                                    | S18 |
| Figures S33-S37, $^1\text{H}$ , $^{13}\text{C}\{^1\text{H}\}$ , $^{19}\text{F}\{^1\text{H}\}$ , $^{31}\text{P}\{^1\text{H}\}$ and $^{77}\text{Se}\{^1\text{H}\}$ NMR spectra of <b>10</b> | S20 |
| Figure S38-41, $^{21}\text{H}$ , $^{13}\text{C}\{^1\text{H}\}$ , $^{19}\text{F}\{^1\text{H}\}$ and $^{31}\text{P}\{^1\text{H}\}$ NMR spectrum of <b>11</b>                                | S22 |

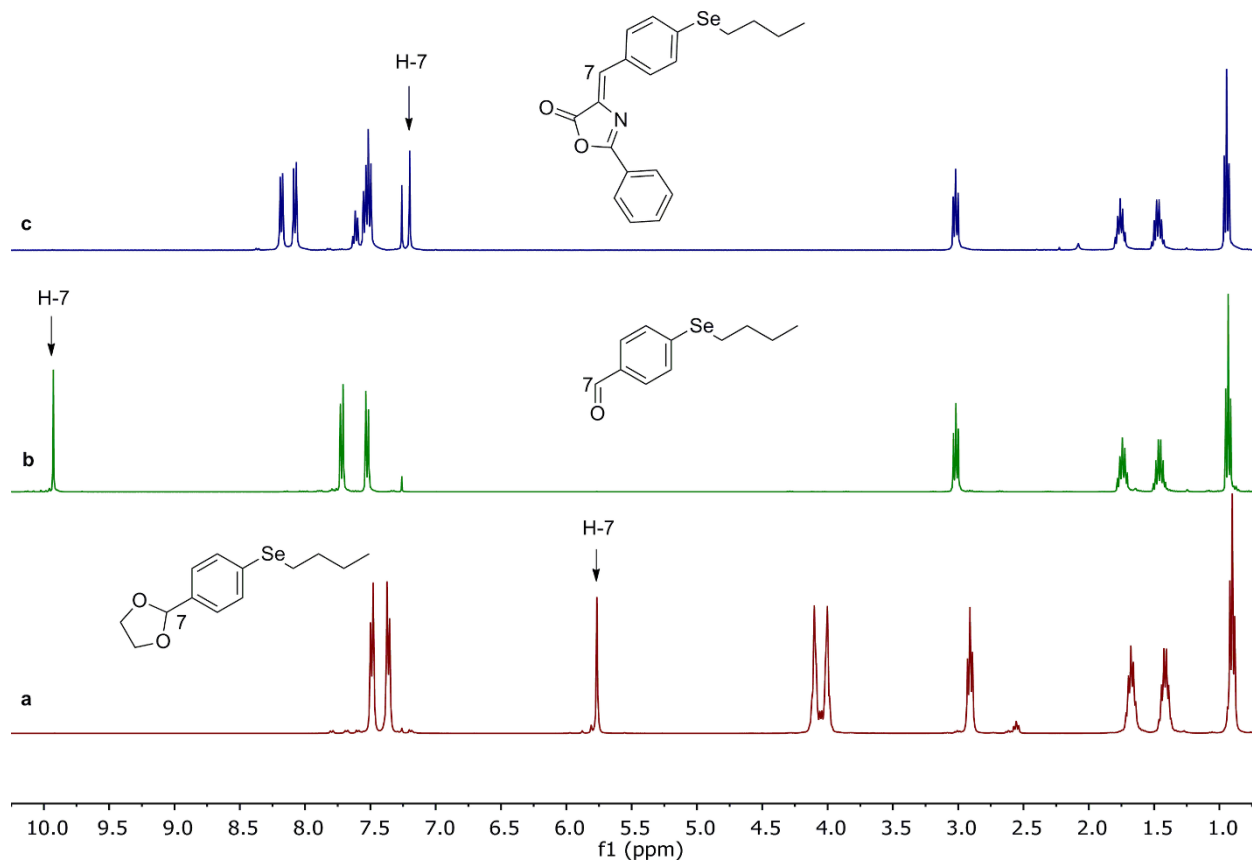

**Figure S1.** <sup>1</sup>H NMR spectra (CDCl<sub>3</sub>) of **1** (a), **3** (b) and **5** (c)

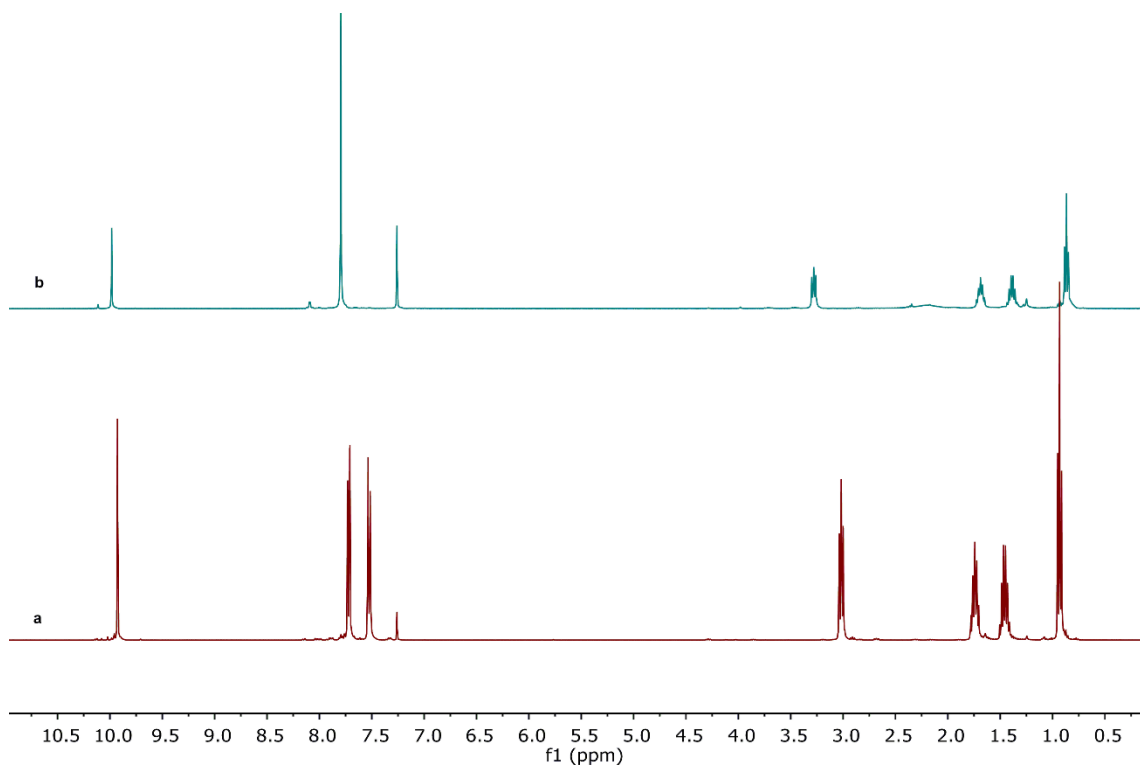

**Figure S2.** <sup>1</sup>H NMR spectra (CDCl<sub>3</sub>) of **3** (a) and **7** (b)

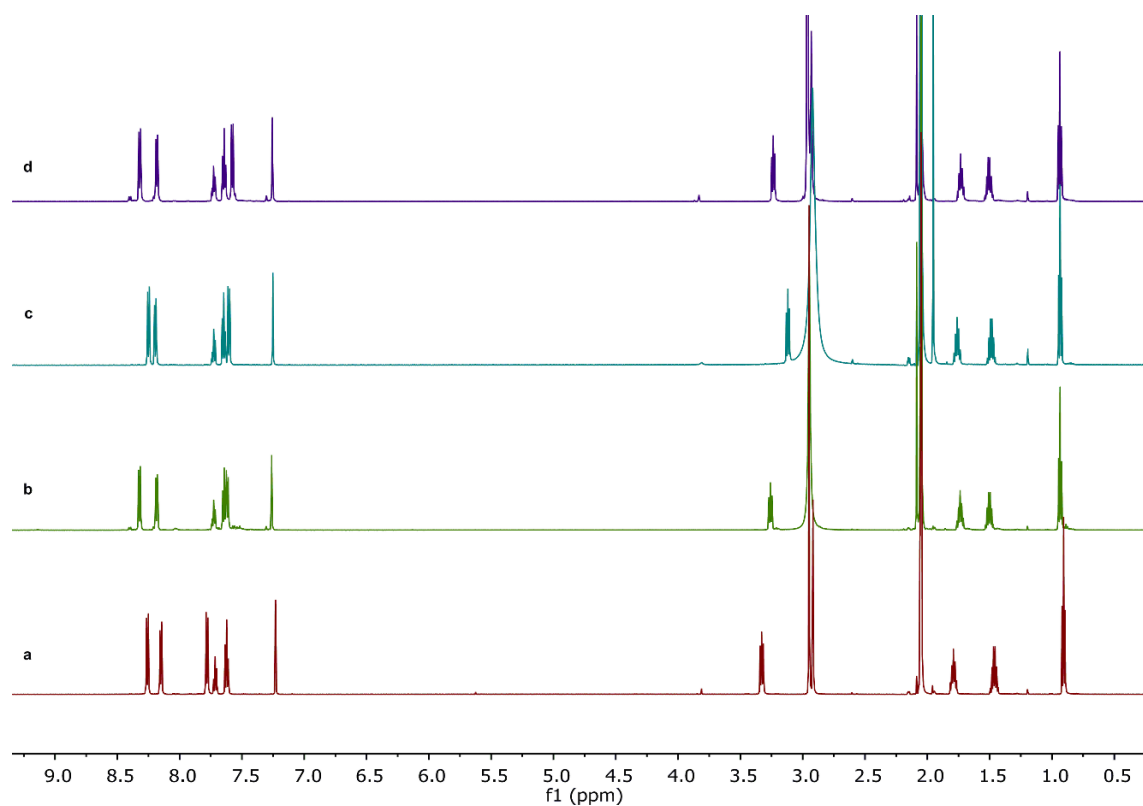

**Figure S3.**  $^1\text{H}$  NMR spectra (acetone- $d_6$ , 600 MHz) of **8** (a), **9** (b), **10** (c) and **11** (d)

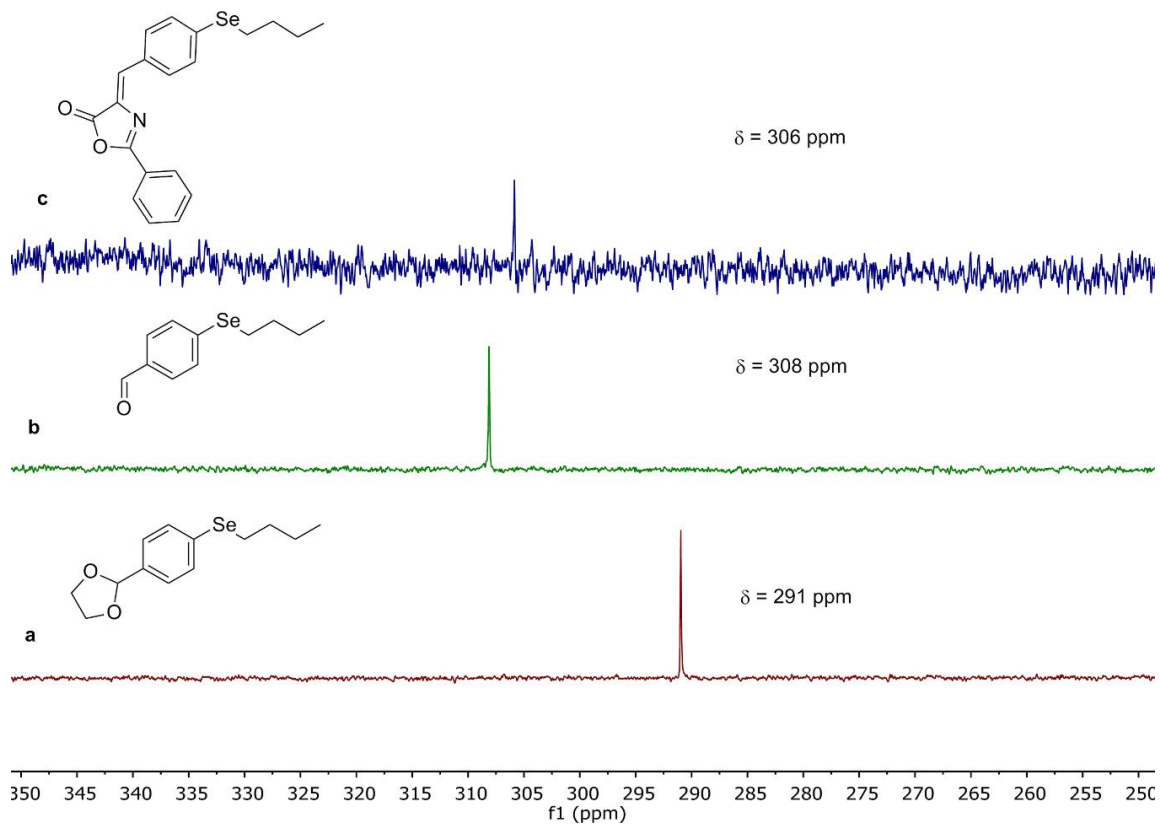

**Figure S4.**  $^{77}\text{Se}$  NMR spectra ( $\text{CDCl}_3$ , 400 MHz) of **1** (a), **3** (b) and **5** (c)

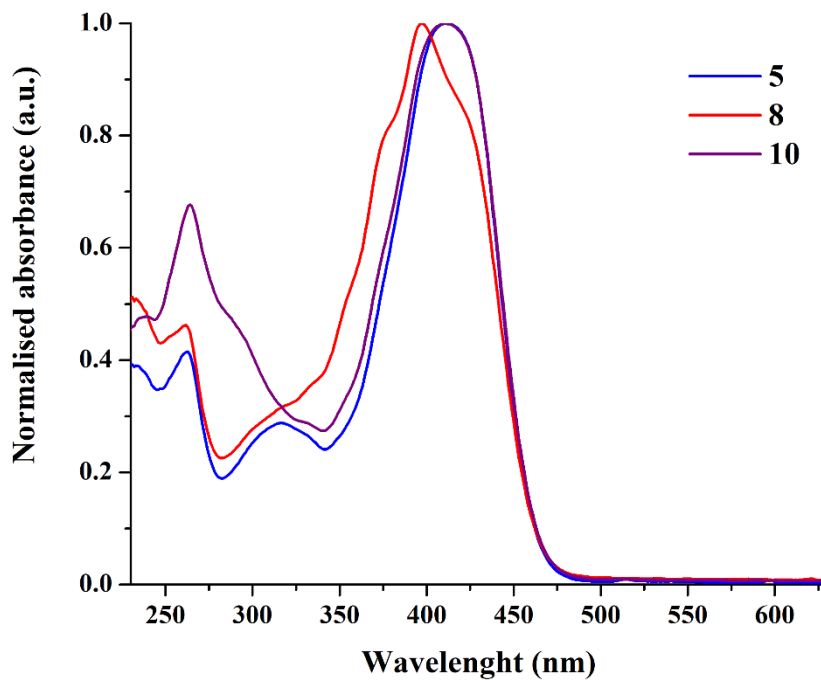

**Figure S5.** UV-Vis spectra of compounds **5**, **8** and **10** (dichloromethane,  $5 \cdot 10^{-5}$  M).

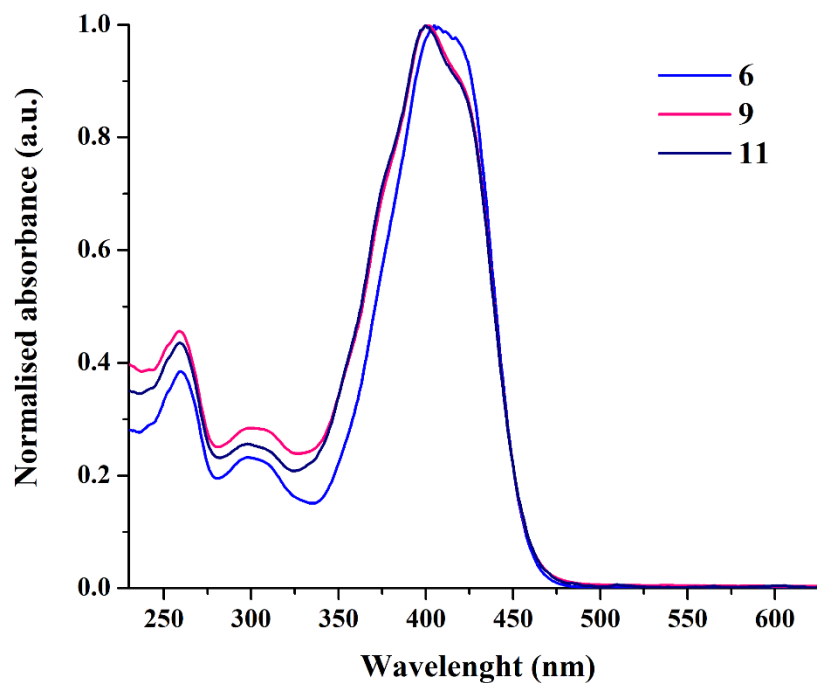

**Figure S6.** UV-Vis spectra of compounds **6**, **9** and **11** (dichloromethane,  $5 \cdot 10^{-5}$  M).

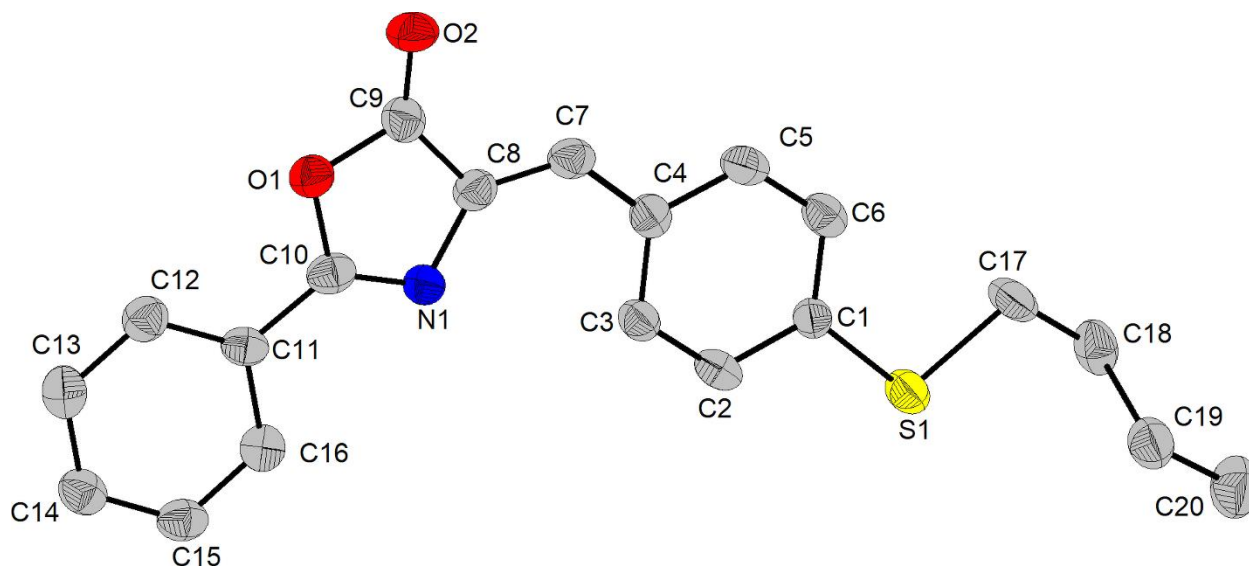

**Figure S7.** Thermal ellipsoids representation at 50% probability of **6**. Hydrogen atoms are omitted for clarity.

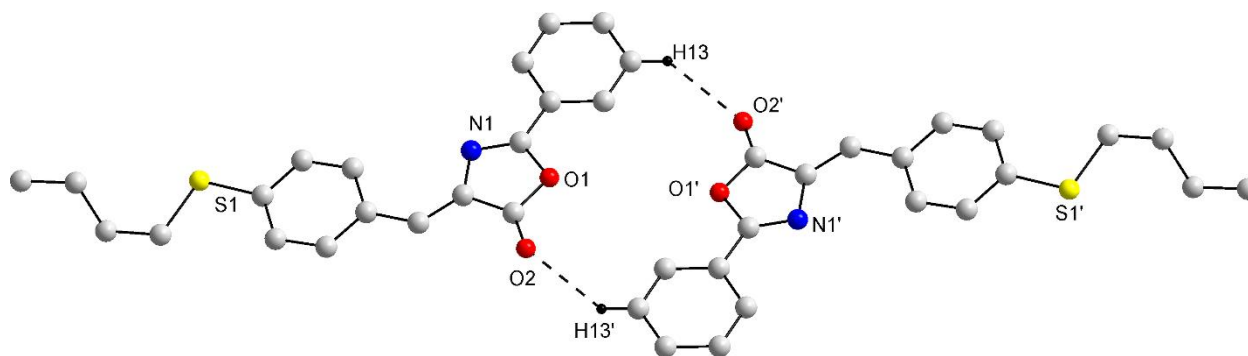

**Figure S8.** Dimeric association in **6** [symmetry equivalent position (2-x, 1-y, 2-z) is given by “prime”]. Hydrogen atoms not involved in intermolecular interactions are omitted for clarity. O2⋯H13' 2.50 Å.

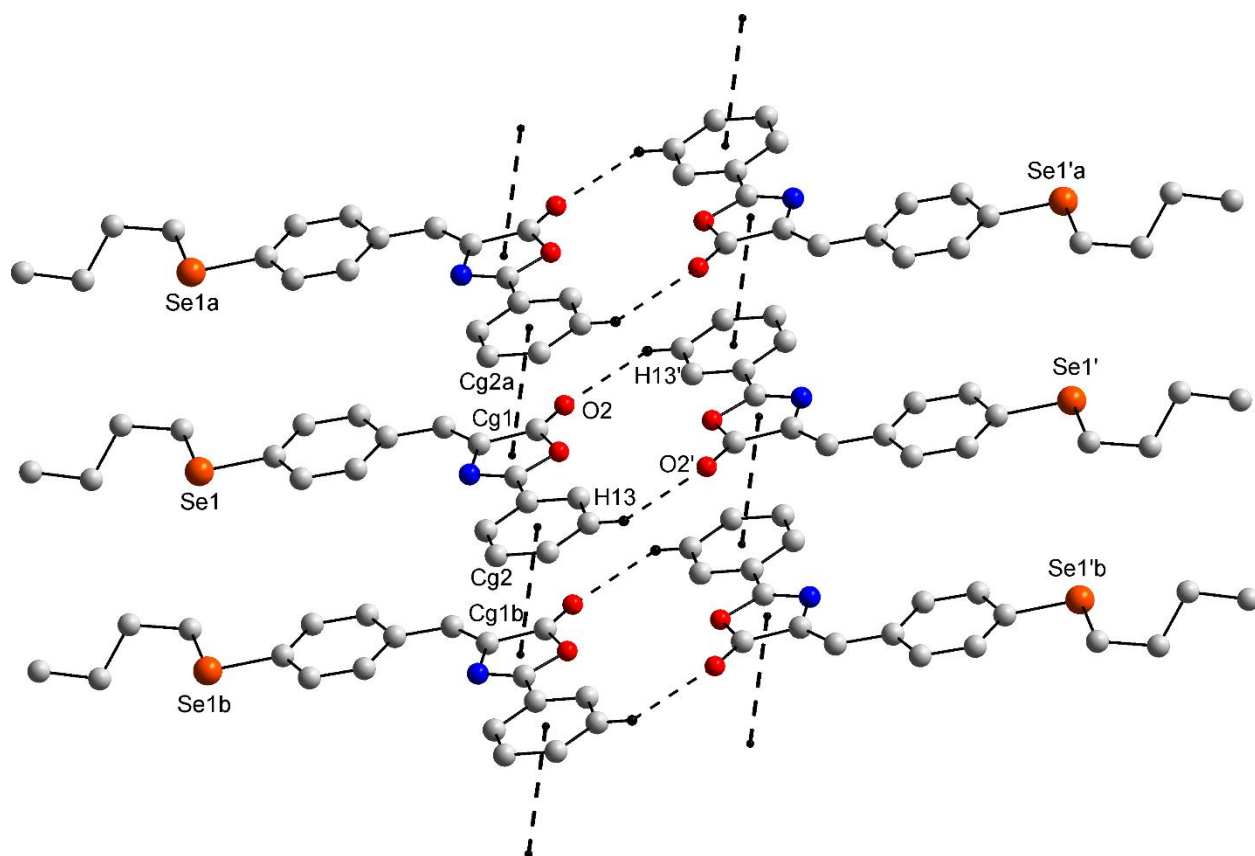

**Figure S9.** Best view of the supramolecular leader-like chain of dimers built through  $\pi \cdots \pi$  interactions in the crystal of **5** (only hydrogen atoms involved in intermolecular interactions are shown). Symmetry equivalent atoms ( $2-x, 1-y, 2-z$ ), ( $x, -1+y, z$ ) and ( $x, 1+y, z$ ) are given by “prime” “a”, and “b”, respectively.  $\text{Cg1} \cdots \text{Cg2}$  3.50 Å.

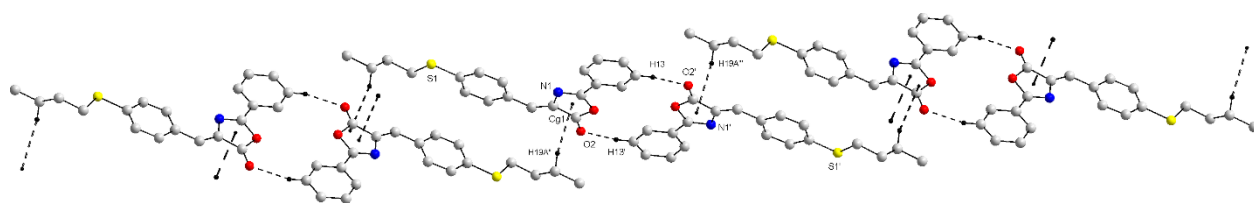

**Figure S10.** Best view of the supramolecular chain of dimers built through  $\text{C-H} \cdots \pi$  interactions in the crystal of **6** (only hydrogen atoms involved in intermolecular interactions are shown). Symmetry equivalent atoms ( $2-x, 1-y, 2-z$ ), ( $1-x, 1/2+y, 3/2-z$ ) and ( $1+x, 1/2-y, 1/2+z$ ) are given by “prime” “double prime”, and “triple prime”, respectively.  $\text{O2} \cdots \text{H13'}$  2.50 Å and  $\text{C-H19A}'' \cdots \text{Cg1}$  2.99 Å.

**Table S2.** Crystal data and details of data collection for **5**, **6** and **9**.

| Compound                                    | <b>5</b>                                           | <b>6</b>                                          | <b>9</b>                                                                                                     |
|---------------------------------------------|----------------------------------------------------|---------------------------------------------------|--------------------------------------------------------------------------------------------------------------|
| Empirical formula                           | C <sub>20</sub> H <sub>19</sub> NO <sub>2</sub> Se | C <sub>20</sub> H <sub>19</sub> NO <sub>2</sub> S | C <sub>42</sub> H <sub>38</sub> Ag <sub>2</sub> F <sub>6</sub> N <sub>2</sub> O <sub>10</sub> S <sub>4</sub> |
| Formula weight                              | 384.32                                             | 337.42                                            | 1188.72                                                                                                      |
| <i>T</i> [K]                                | 100.(2)                                            | 100.(2)                                           | 100.(2)                                                                                                      |
| Crystal system                              | monoclinic                                         | monoclinic                                        | monoclinic                                                                                                   |
| Space group                                 | P21/c                                              | P21/c                                             | C2/c                                                                                                         |
| <i>a</i> [Å]                                | 18.3038(11)                                        | 18.681(2)                                         | 41.589(5)                                                                                                    |
| <i>b</i> [Å]                                | 5.2946(3)                                          | 5.2749(6)                                         | 13.9962(18)                                                                                                  |
| <i>c</i> [Å]                                | 18.3266(11)                                        | 17.908(2)                                         | 15.4588(17)                                                                                                  |
| $\alpha$ [°]                                | 90                                                 | 90                                                | 90                                                                                                           |
| $\beta$ [°]                                 | 102.537(2)                                         | 104.319(4)                                        | 100.215(5)                                                                                                   |
| $\gamma$ [°]                                | 90                                                 | 90                                                | 90                                                                                                           |
| <i>V</i> [Å <sup>3</sup> ]                  | 1733.71(18)                                        | 1709.8(3)                                         | 8855.7(18)                                                                                                   |
| <i>Z</i>                                    | 4                                                  | 4                                                 | 8                                                                                                            |
| $\rho_{\text{calcd}}$ [g cm <sup>-3</sup> ] | 1.472                                              | 1.311                                             | 1.783                                                                                                        |
| Absorption coefficient [mm <sup>-1</sup> ]  | 2.177                                              | 0.201                                             | 1.159                                                                                                        |
| Crystal size [mm]                           | 0.057x0.087x0.12                                   | 0.089x0.092x0.122                                 | 0.012x0.085x 0.132                                                                                           |
| $\Theta$ range for data collection          | 2.28 to 28.33                                      | 2.2503 to 25.7198                                 | 2.3301 to 28.2410                                                                                            |
| Reflections collected                       | 62141                                              | 36429                                             | 131001                                                                                                       |
| Independent reflections                     | 4317                                               | 4226                                              | 11010                                                                                                        |
|                                             | [R(int) = 0.1672]                                  | [R(int) = 0.2359]                                 | [R(int) = 0.0571]                                                                                            |
| Data/restraints/parameters                  | 4317/0/221                                         | 36429/0/218                                       | 11010/0/597                                                                                                  |
| Final R indices [I>2sigma(I)]               | R1 = 0.0452                                        | R1 = 0.0999                                       | R1 = 0.0293                                                                                                  |
|                                             | wR2 = 0.0688                                       | wR2 = 0.1527                                      | wR2 = 0.0518                                                                                                 |
| R indices (all data)                        | R1 = 0.0929                                        | R1 = 0.2132                                       | R1 = 0.0437                                                                                                  |
|                                             | wR2 = 0.0818                                       | wR2 = 0.1900                                      | wR2 = 0.0571                                                                                                 |
| Goodness-of-fit on F <sup>2</sup>           | 1.088                                              | 1.064                                             | 1.057                                                                                                        |
| Largest diff. peak/hole / e Å <sup>-3</sup> | 0.551 / -0.480                                     | 0.850 / -0.301                                    | 0.492 / -0.625                                                                                               |



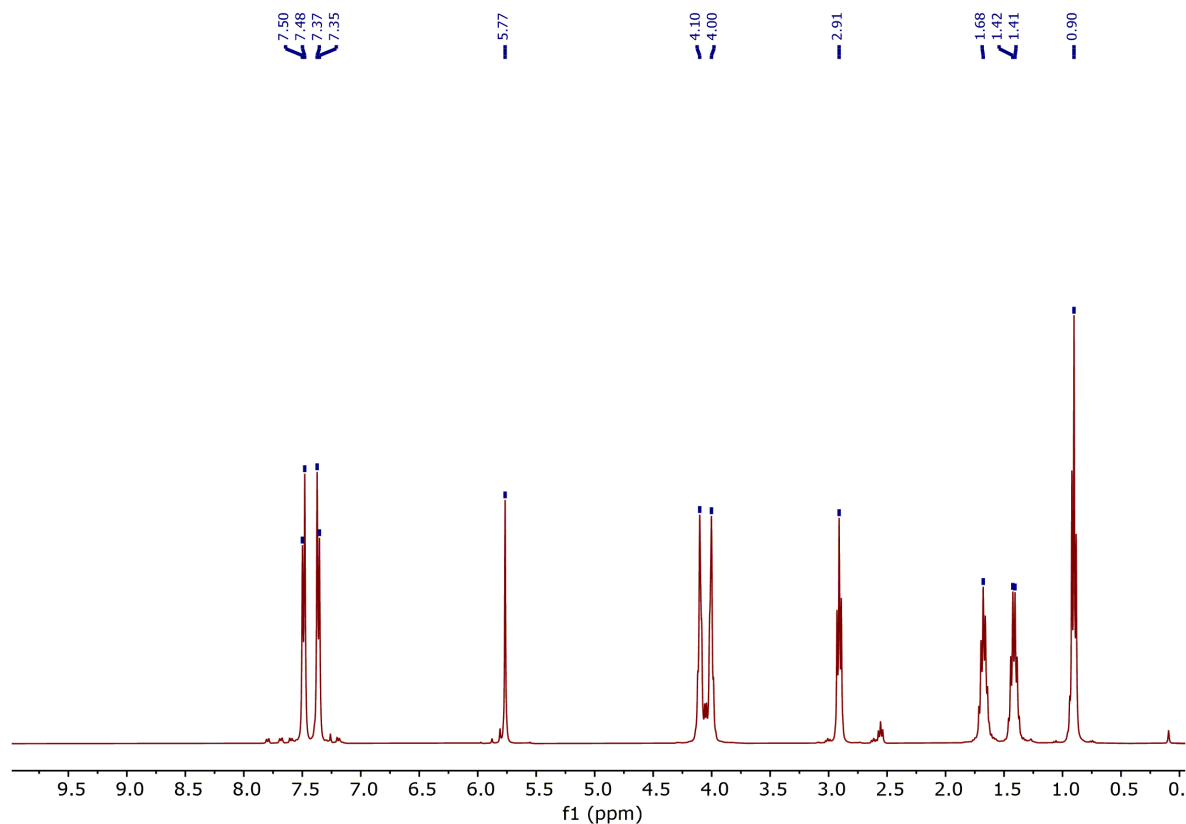

Figure S10.  $^1\text{H}$  NMR spectrum ( $\text{CDCl}_3$ , 400.13 MHz, 20 °C) of **1**

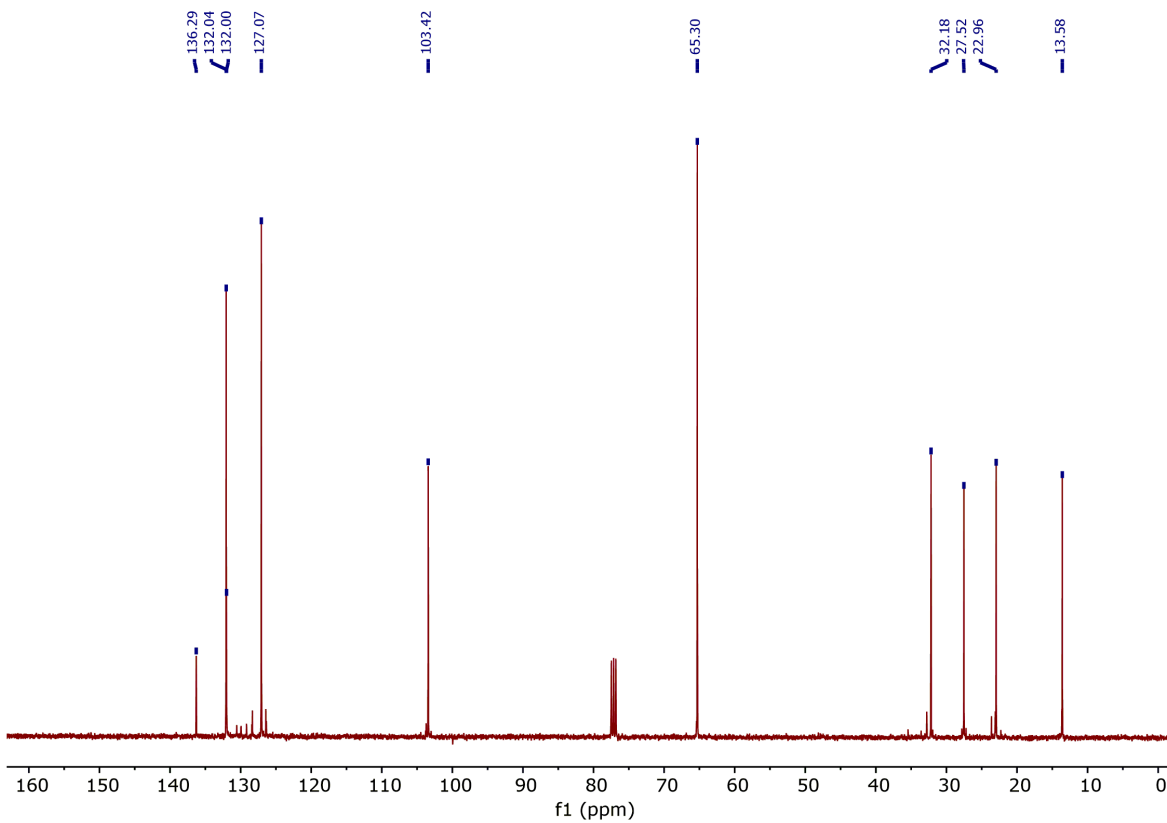

Figure S12.  $^{13}\text{C}\{^1\text{H}\}$  NMR spectrum ( $\text{CDCl}_3$ , 100.61 MHz, 20 °C) of **1**

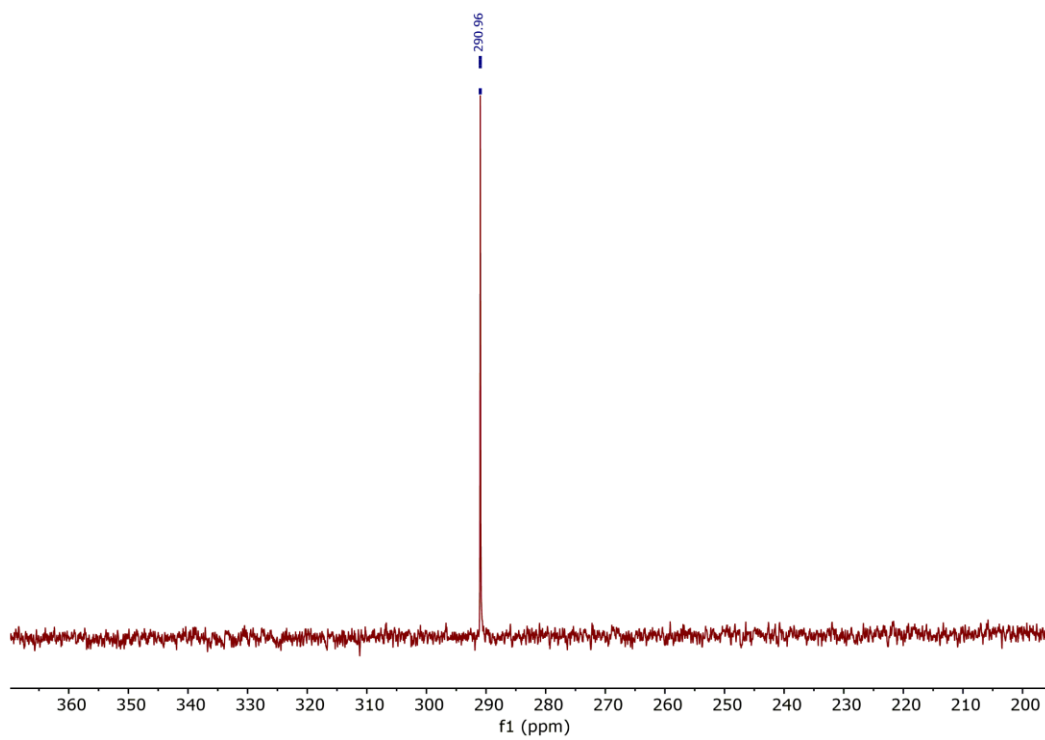

**Figure S13.**  $^{77}\text{Se}\{^1\text{H}\}$  NMR spectrum ( $\text{CDCl}_3$ , 76.31 MHz, 20 °C) of **1**

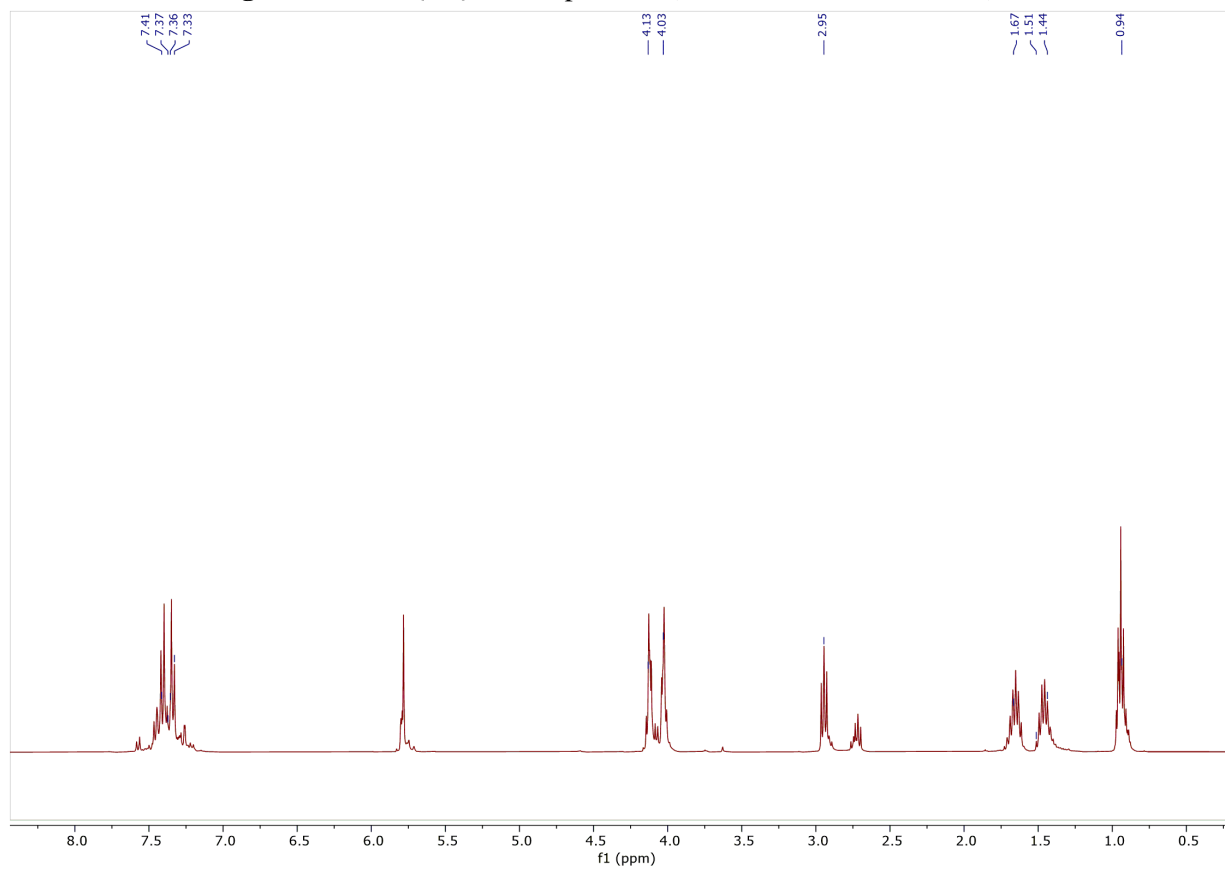

**Figure S14.**  $^1\text{H}$  NMR spectrum ( $\text{CDCl}_3$ , 400.13 MHz, 20 °C) of **2**

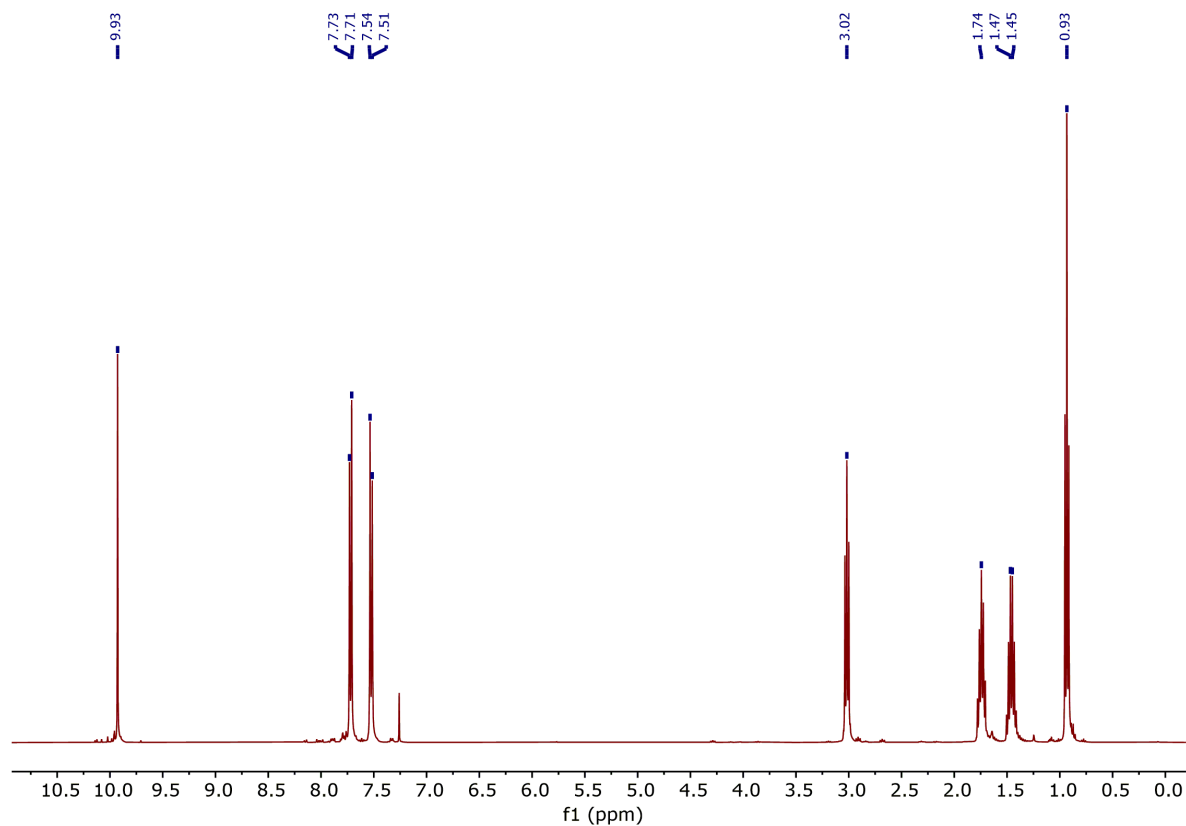

Figure S15. <sup>1</sup>H NMR spectrum (CDCl<sub>3</sub>, 400.13 MHz, 20 °C) of **3**

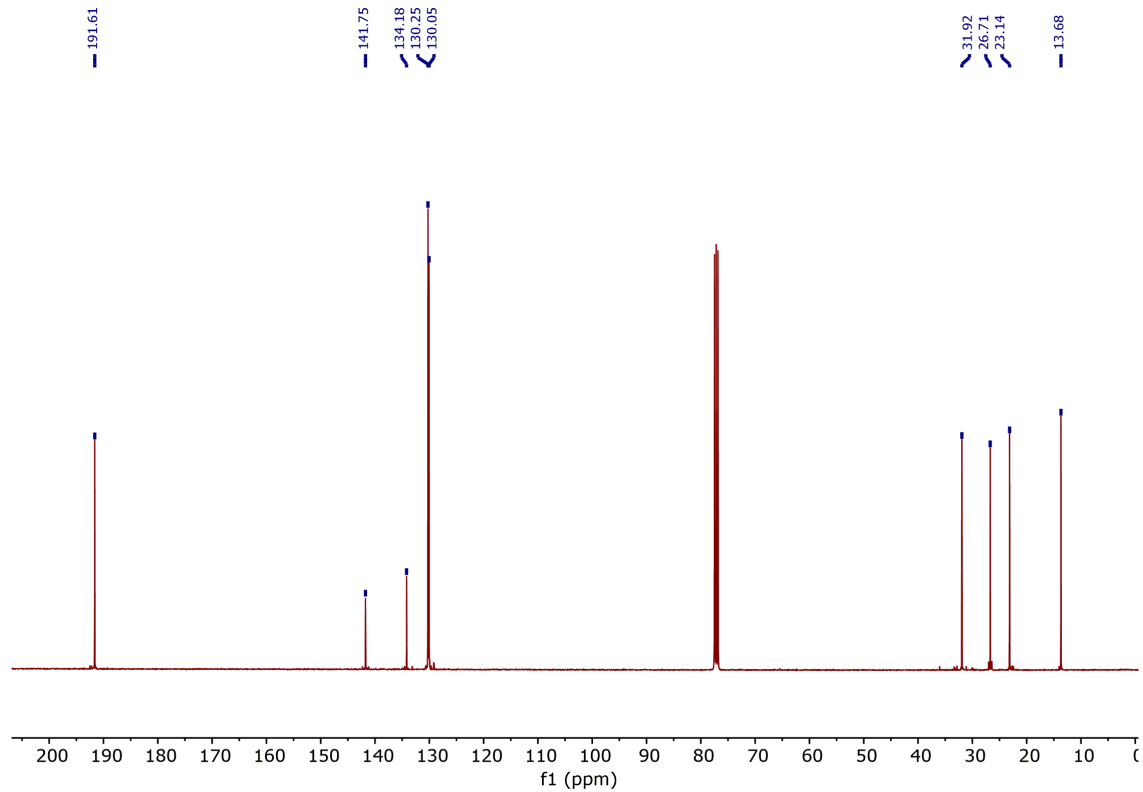

Figure S16. <sup>13</sup>C{<sup>1</sup>H} NMR spectrum (CDCl<sub>3</sub>, 100.61 MHz, 20 °C) of **3**

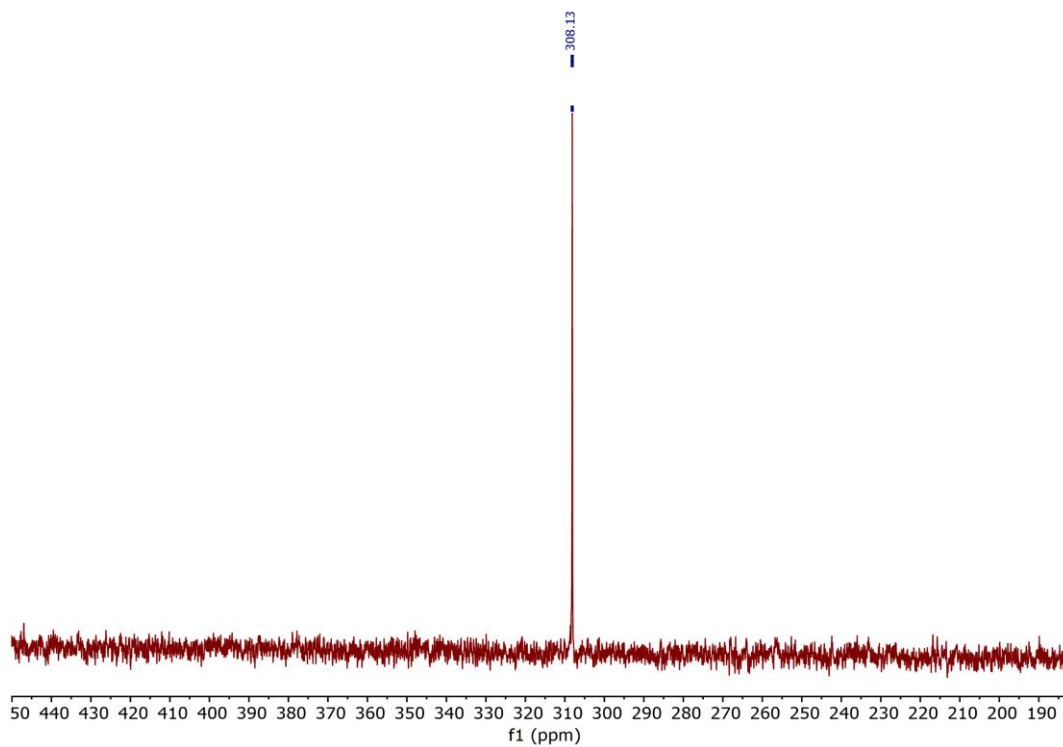

**Figure S17.**  $^{77}\text{Se}\{^1\text{H}\}$  NMR spectrum ( $\text{CDCl}_3$ , 76.31 MHz, 20 °C) of **3**

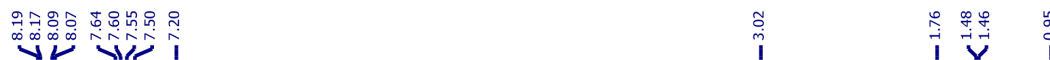

**Figure S18.**  $^1\text{H}$  NMR spectrum ( $\text{CDCl}_3$ , 400.13 MHz, 20 °C) of **5**

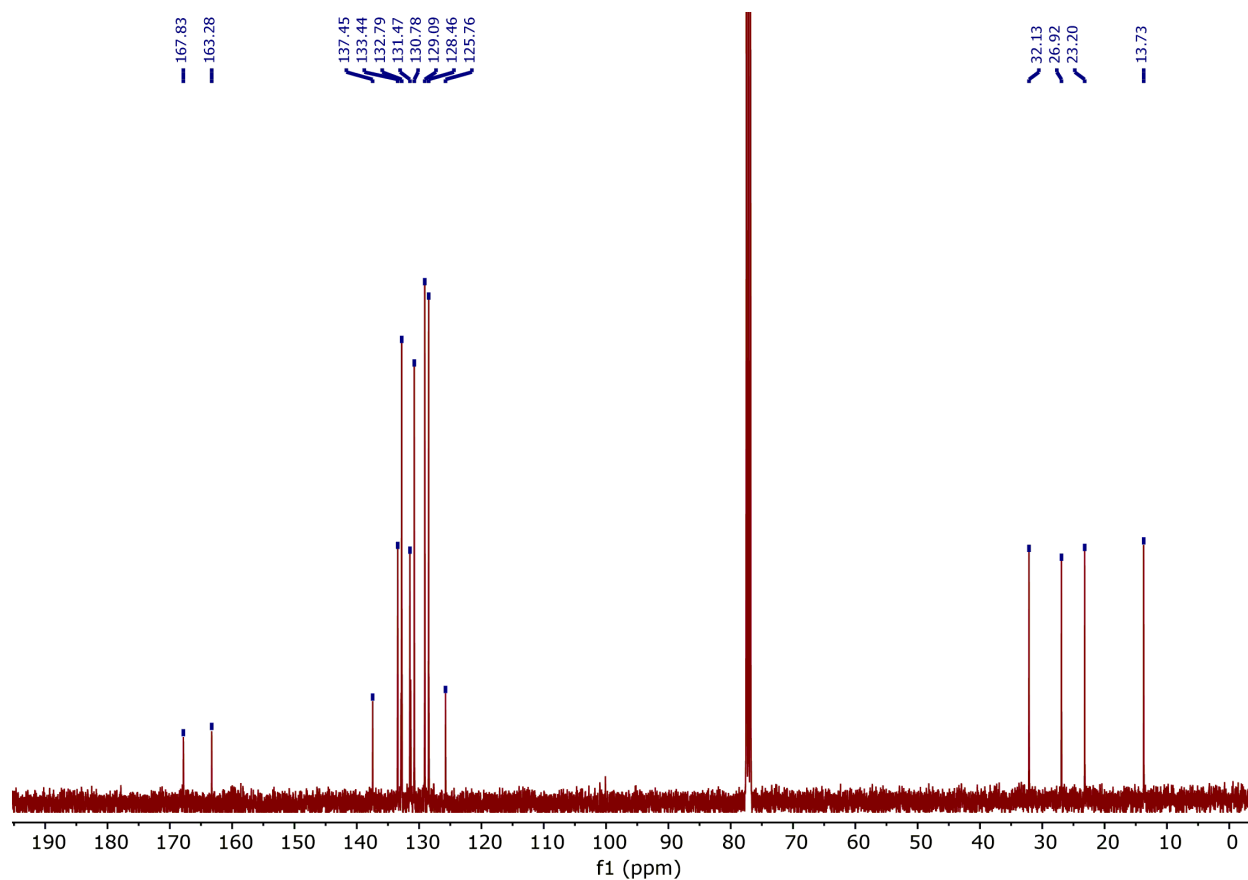

**Figure S19.**  $^{13}\text{C}\{^1\text{H}\}$  NMR spectrum ( $\text{CDCl}_3$ , 100.61 MHz, 20 °C) of **5**

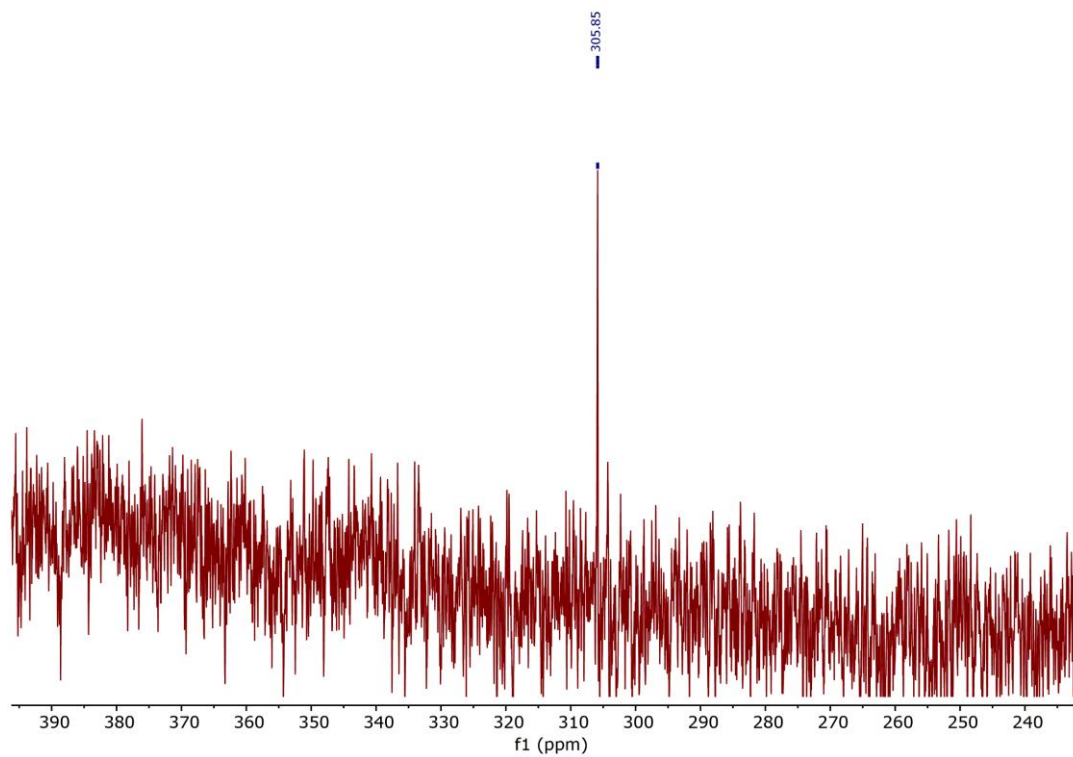

**Figure S20.**  $^{77}\text{Se}\{^1\text{H}\}$  NMR spectrum ( $\text{CDCl}_3$ , 76.31 MHz, 20 °C) of **5**

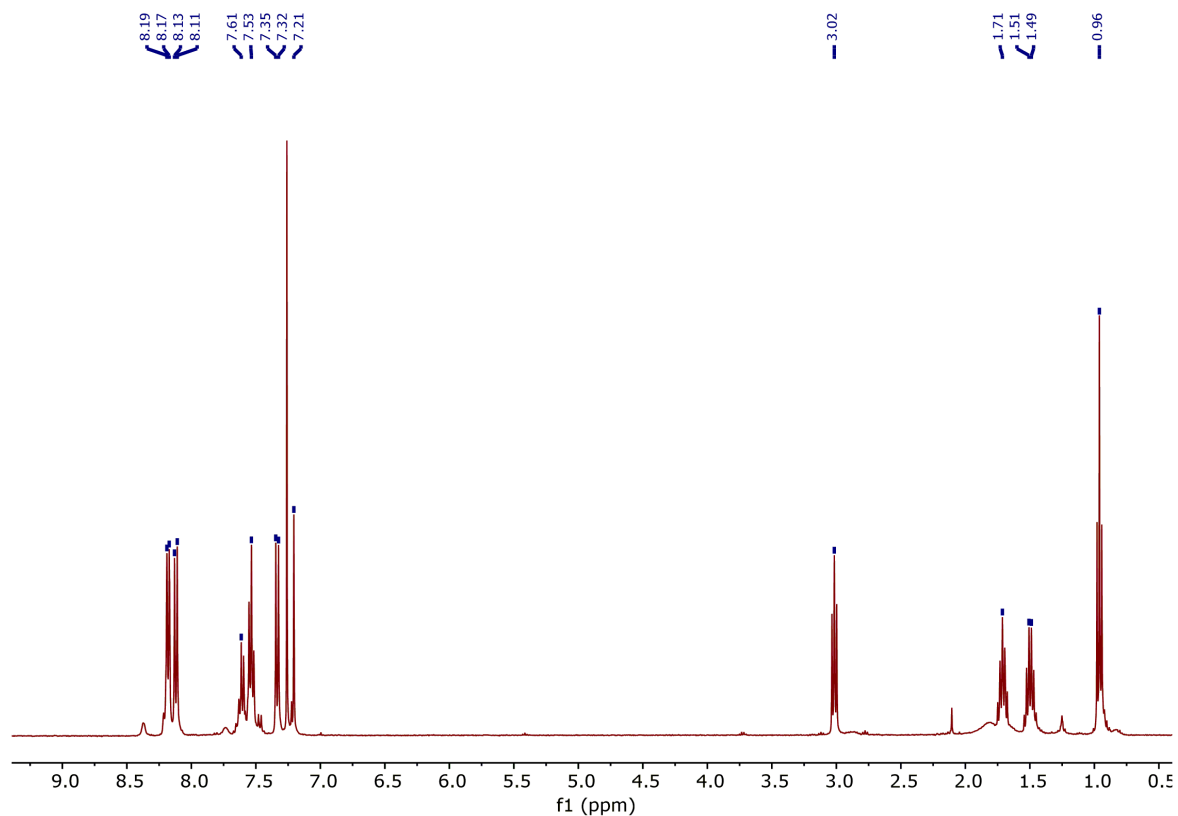

Figure S21.  $^1\text{H}$  NMR spectrum ( $\text{CDCl}_3$ , 400.13 MHz, 20 °C) of **6**

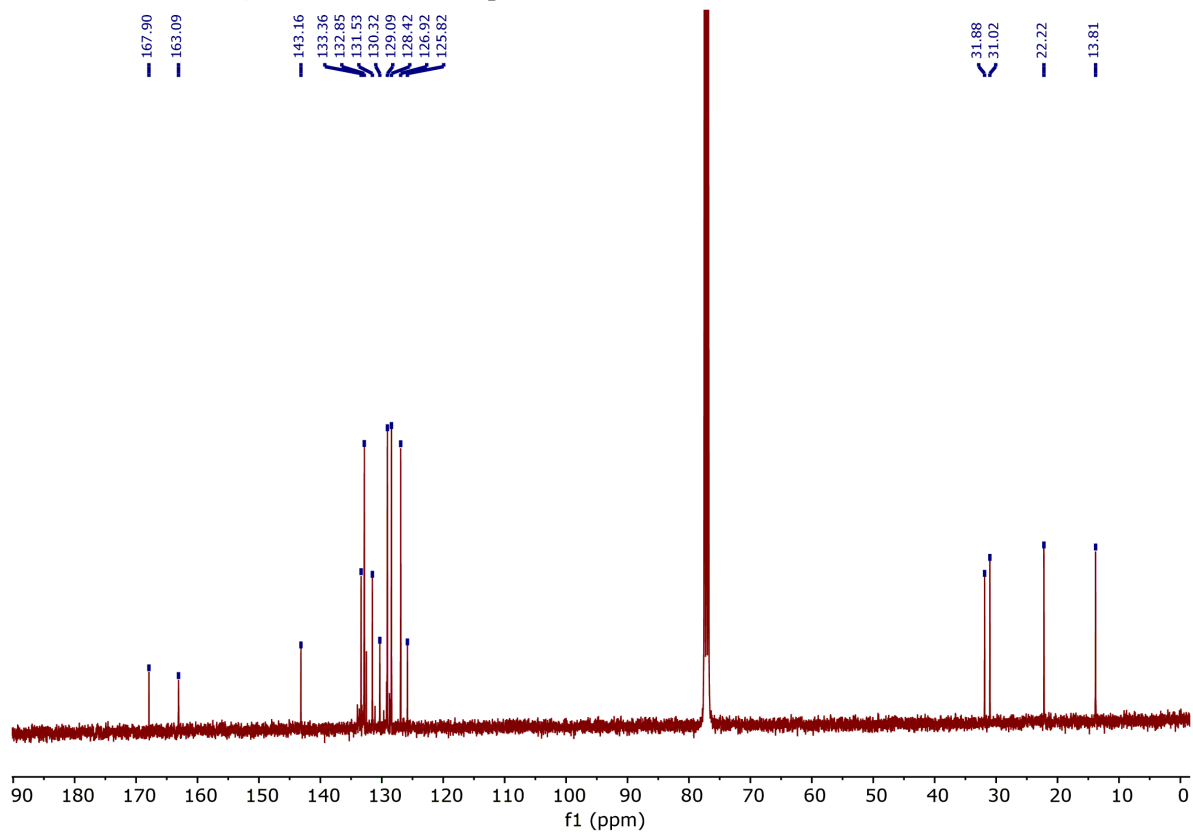

Figure S22.  $^{13}\text{C}\{^1\text{H}\}$  NMR spectrum ( $\text{CDCl}_3$ , 100.61 MHz, 20 °C) of **6**

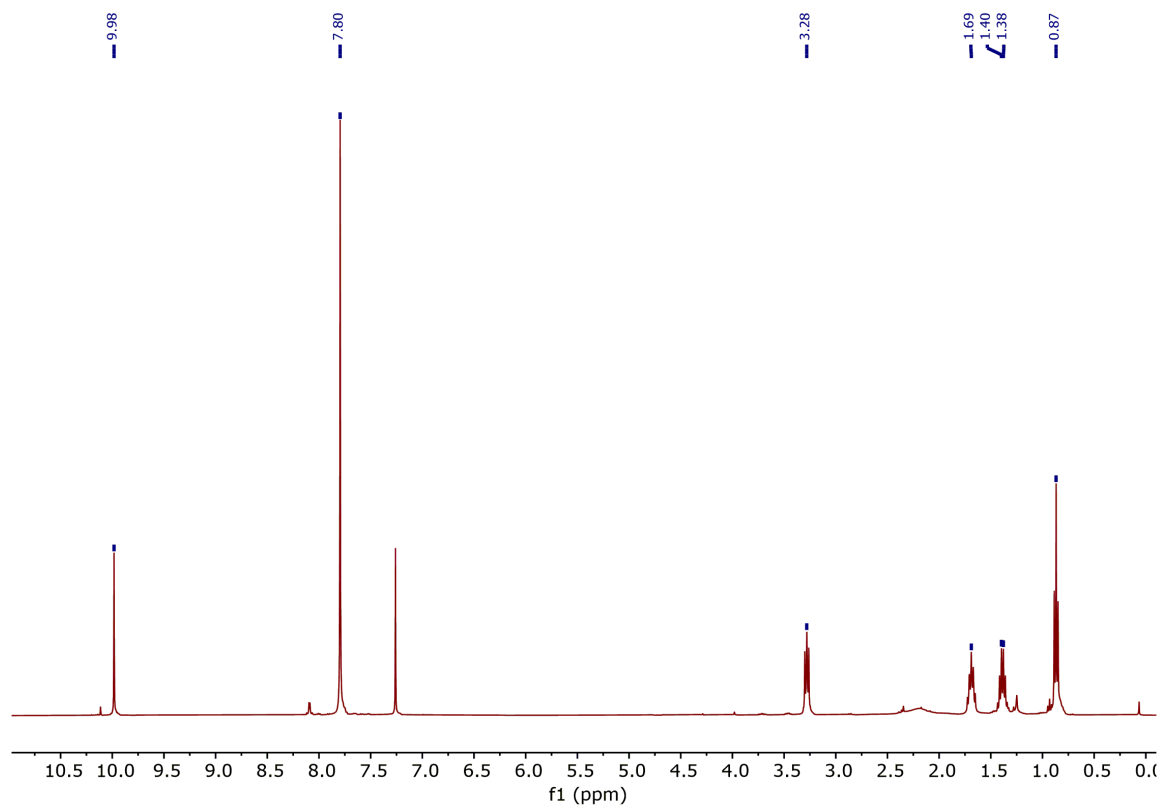

Figure S23.  $^1\text{H}$  NMR spectrum ( $\text{CDCl}_3$ , 400.13 MHz, 20 °C) of **7**

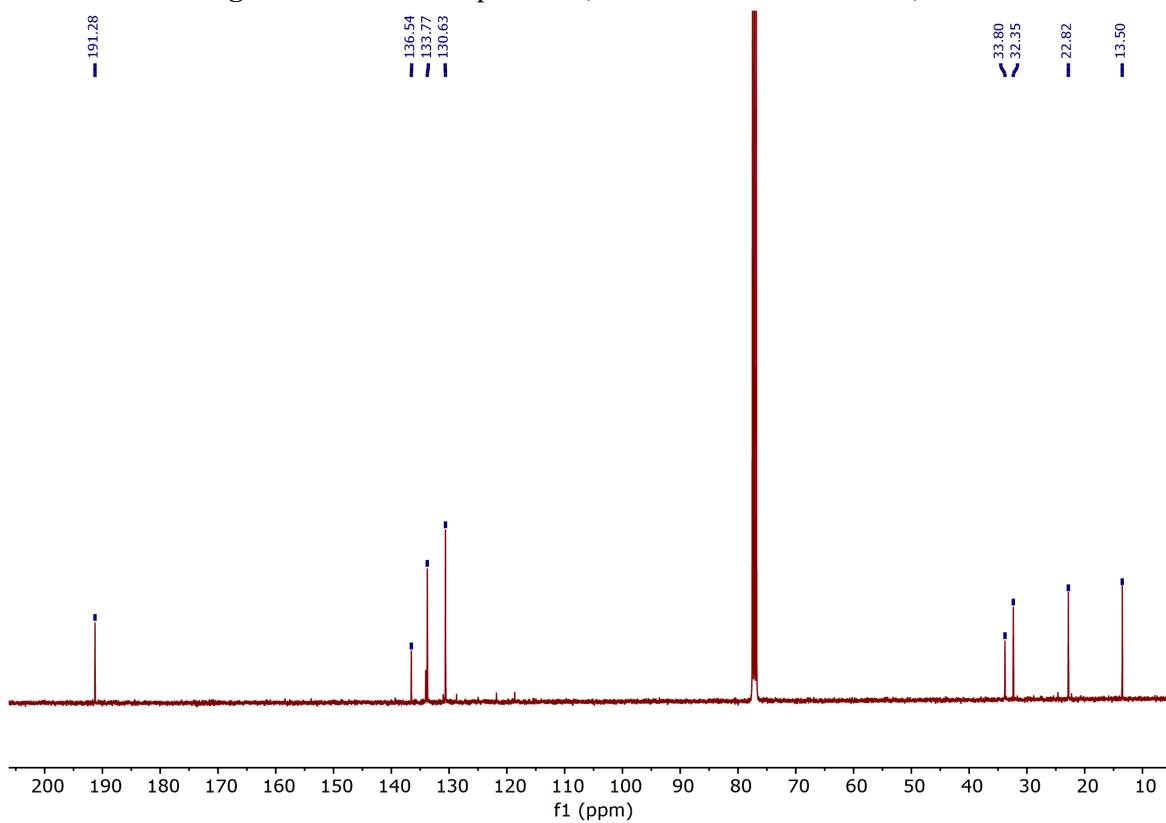

Figure S24.  $^{13}\text{C}\{^1\text{H}\}$  NMR spectrum ( $\text{CDCl}_3$ , 100.61 MHz, 20 °C) of **7**

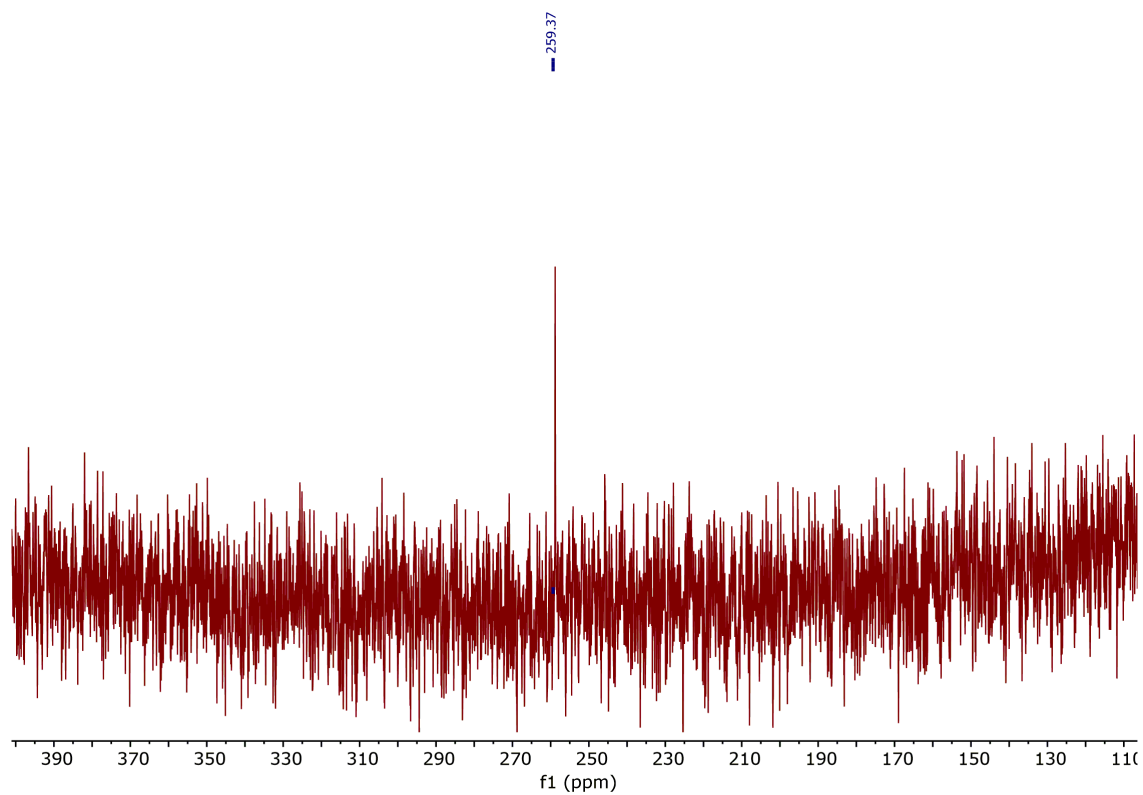

**Figure S25.**  $^{77}\text{Se}\{^1\text{H}\}$  NMR spectrum ( $\text{CDCl}_3$ , 76.31 MHz, 20 °C) of **7**

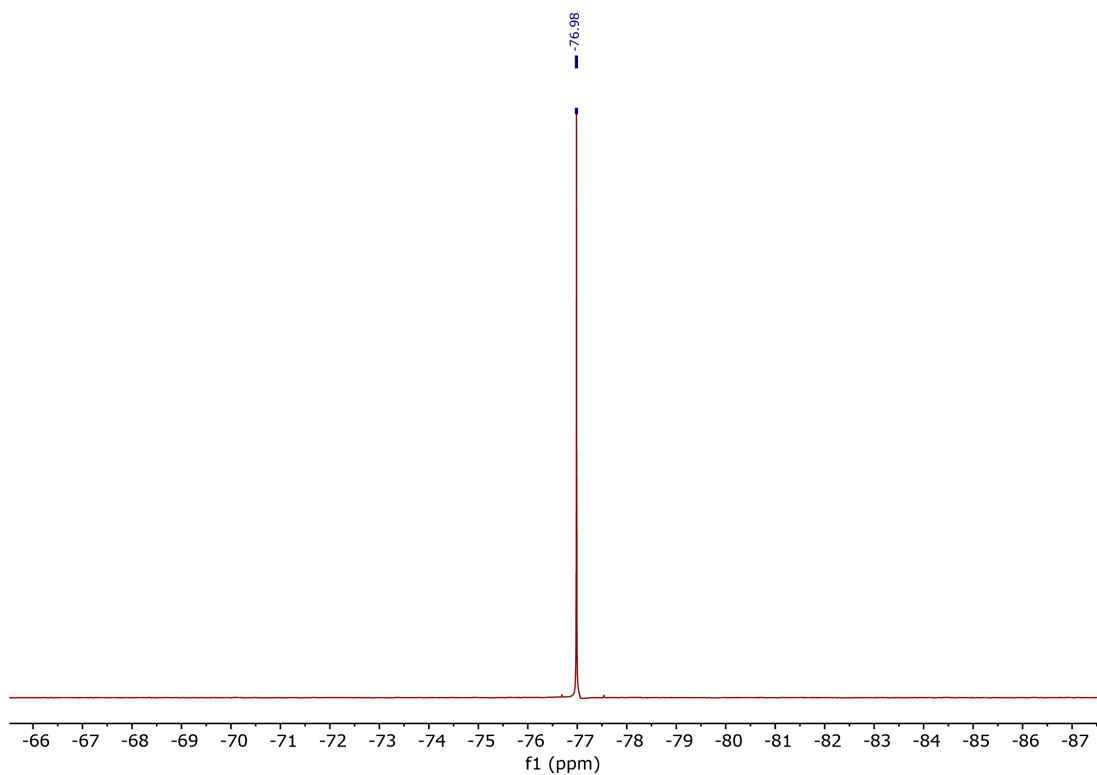

**Figure S26.**  $^{19}\text{F}\{^1\text{H}\}$  NMR spectrum ( $\text{CDCl}_3$ , 376.49 MHz, 20 °C) of **7**



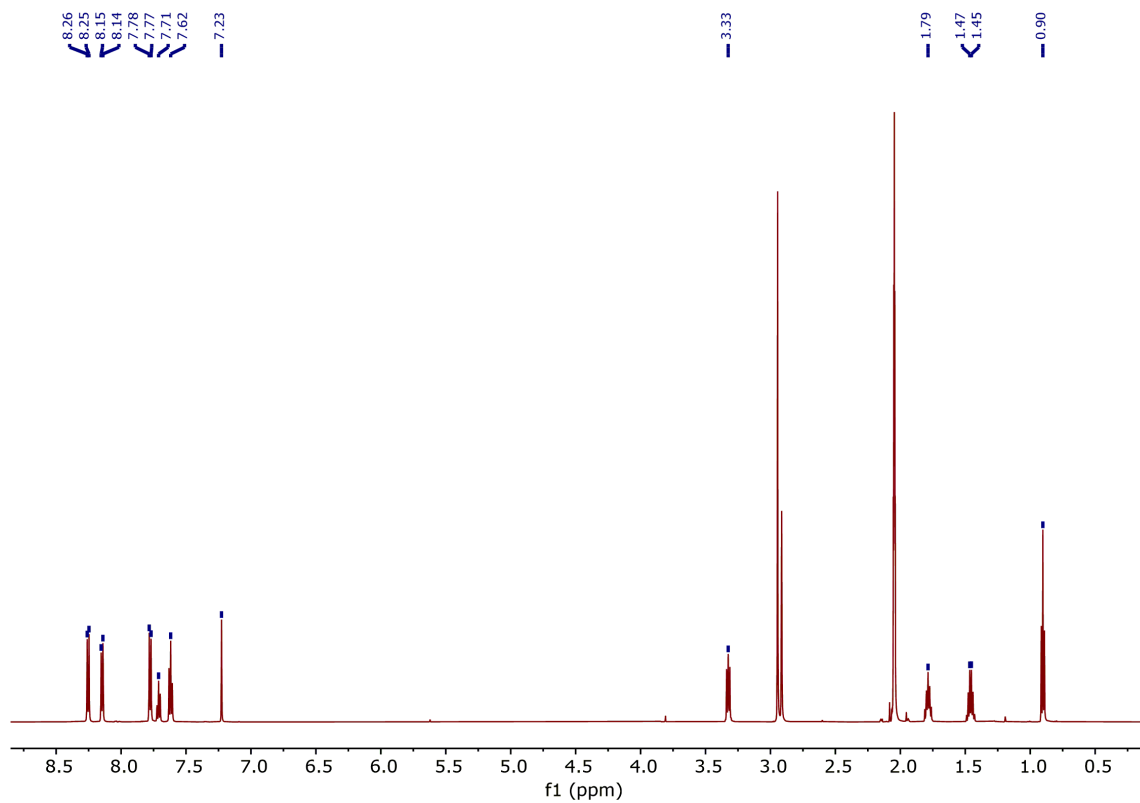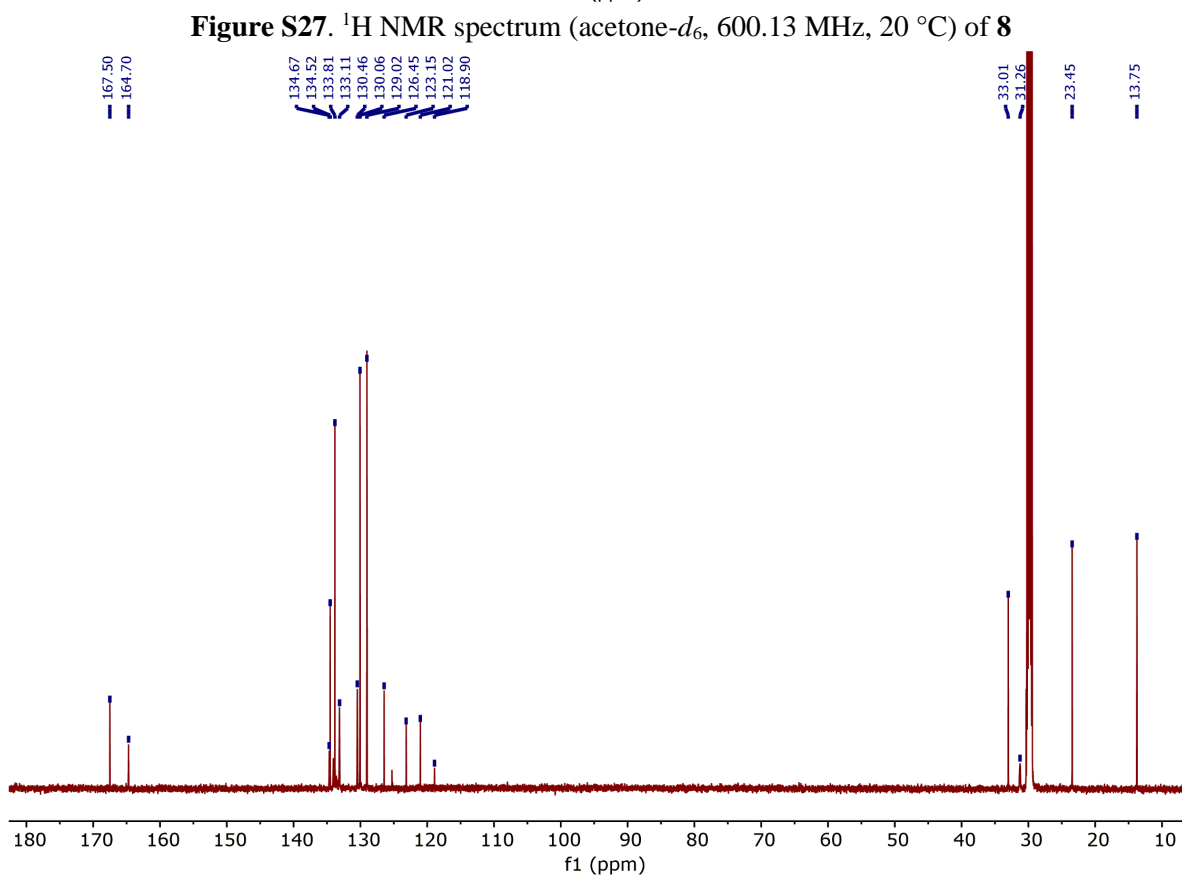

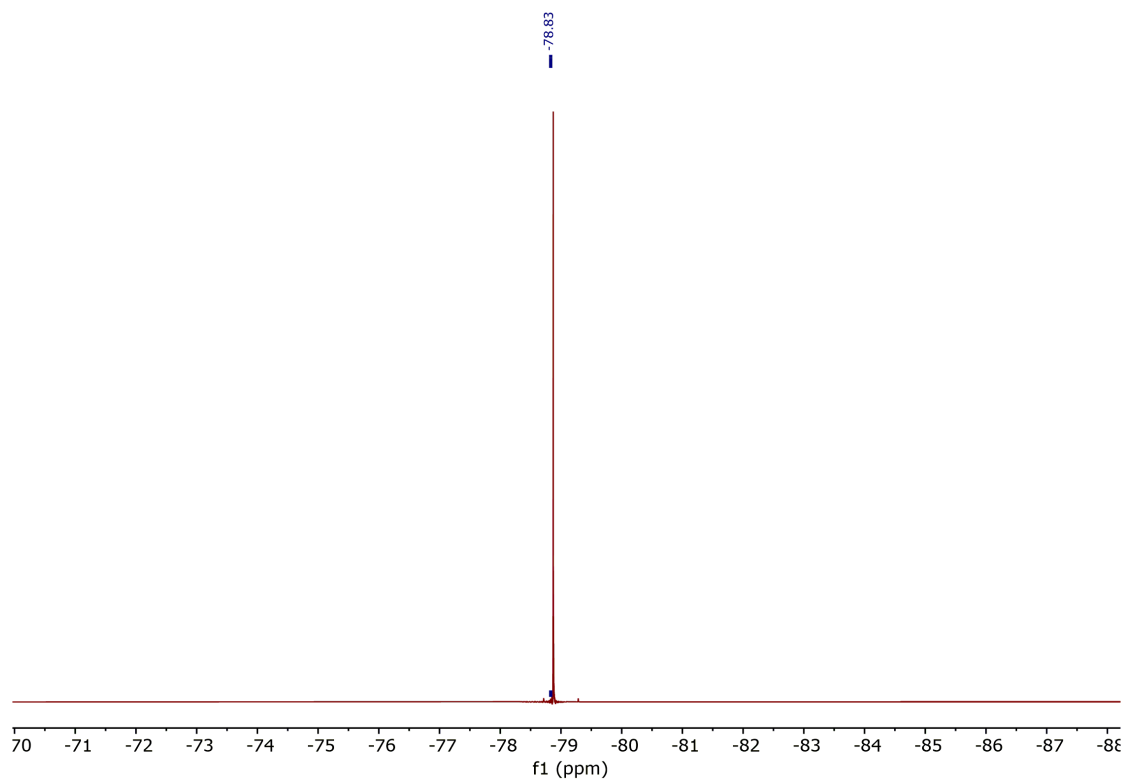

Figure S29.  $^{19}\text{F}\{^1\text{H}\}$  NMR spectrum (acetone- $d_6$ , 564.68 MHz, 20 °C) of **8**

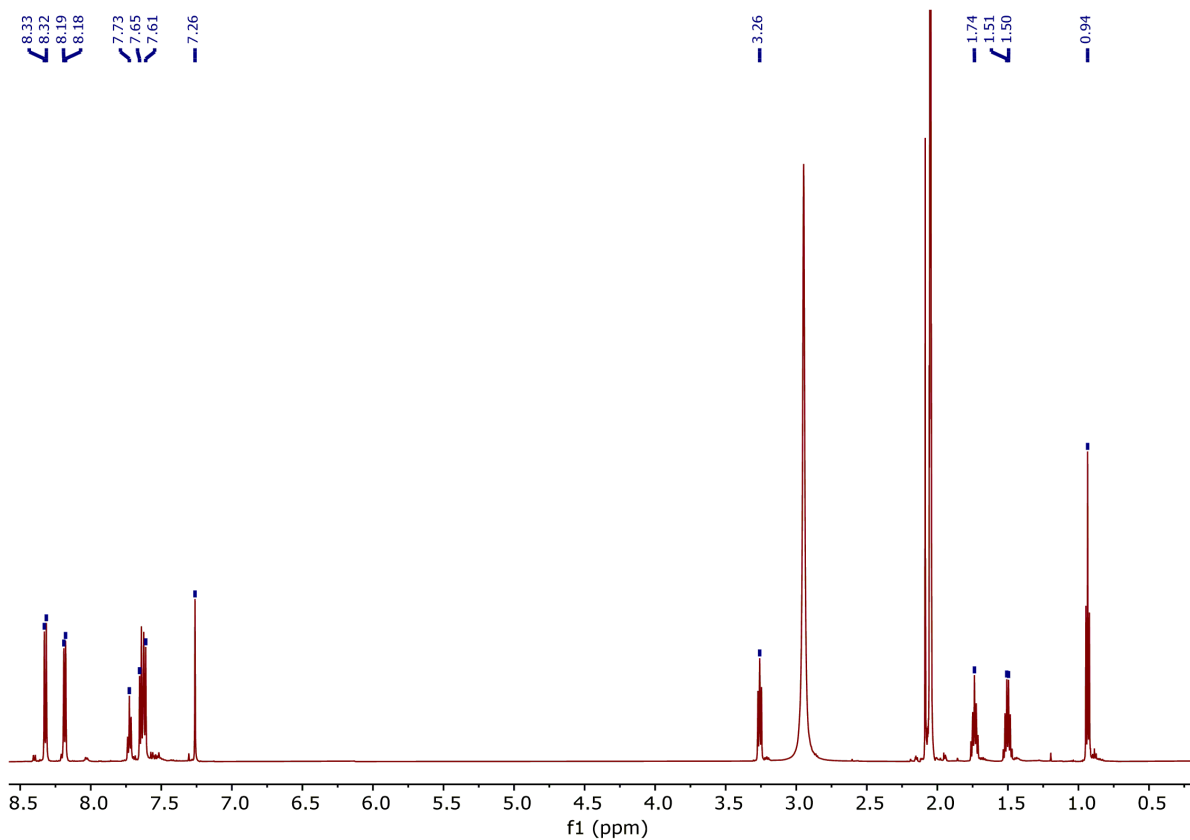

Figure S30.  $^1\text{H}$  NMR spectrum (acetone- $d_6$ , 600.13 MHz, 20 °C) of **9**

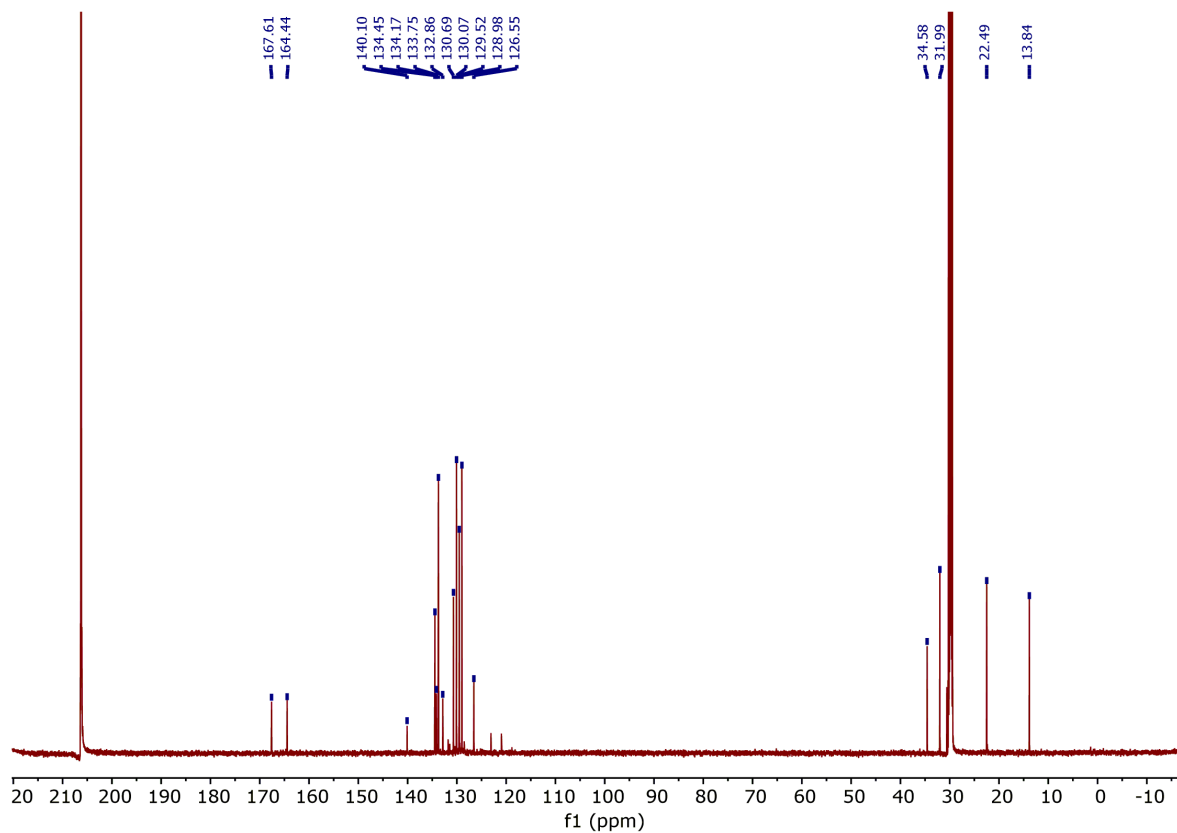

**Figure S31.**  $^{13}\text{C}\{^1\text{H}\}$  NMR spectrum (acetone- $d_6$ , 150.90 MHz, 20 °C) of **9**

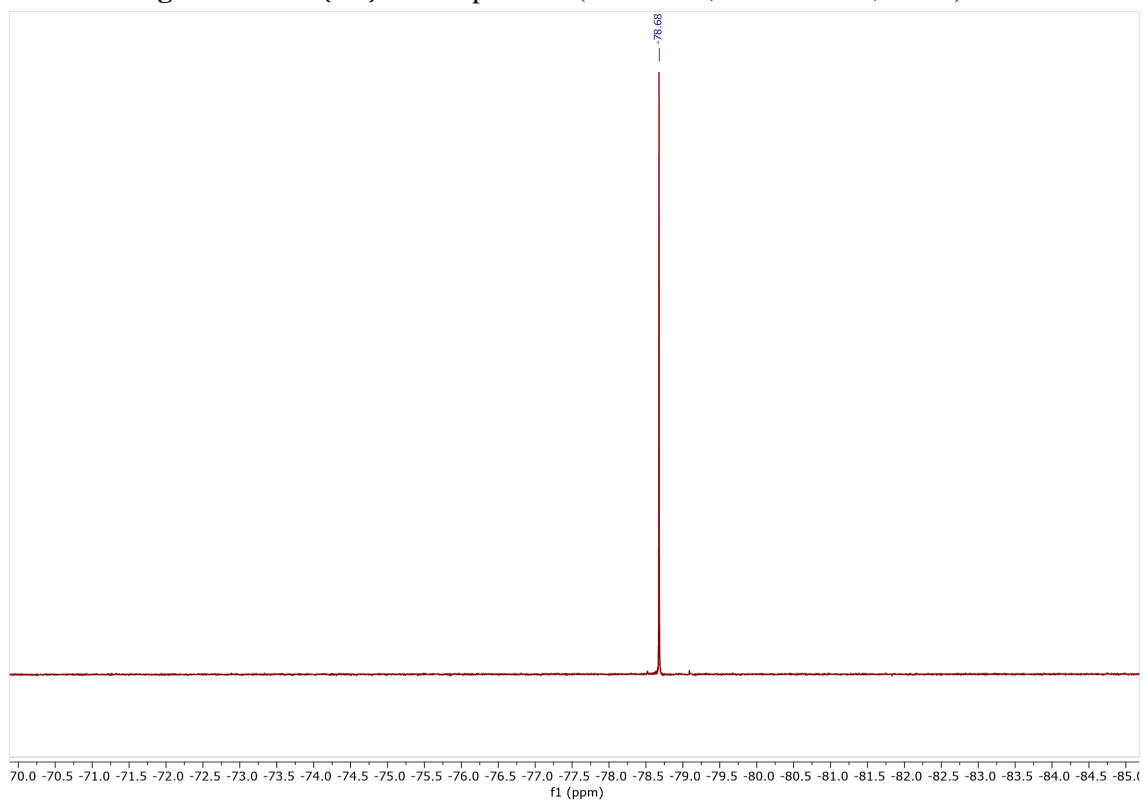

**Figure S32.**  $^{19}\text{F}\{^1\text{H}\}$  NMR spectrum (acetone- $d_6$ , 564.68 MHz, 20 °C) of **9**

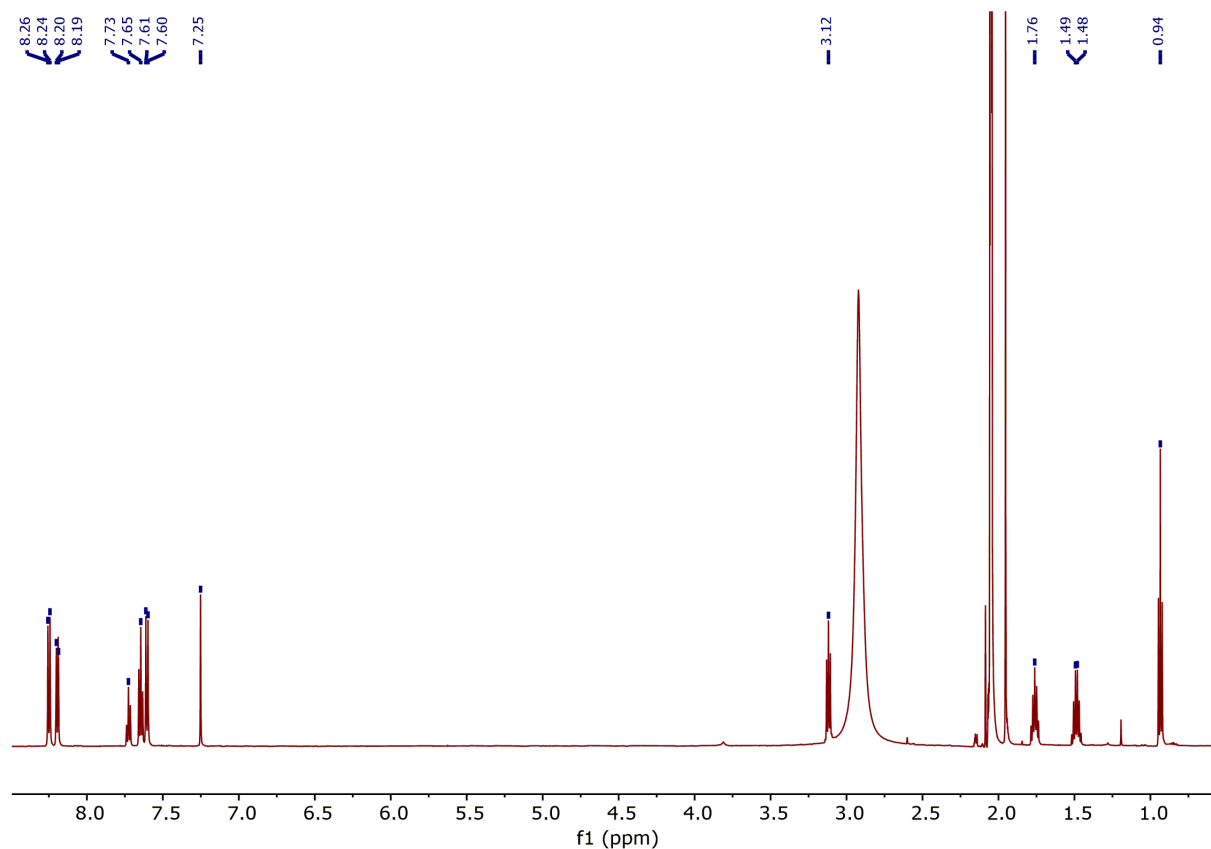

Figure S33.  $^1\text{H}$  NMR spectrum (acetone- $d_6$ , 600.13 MHz, 20 °C) of **10**

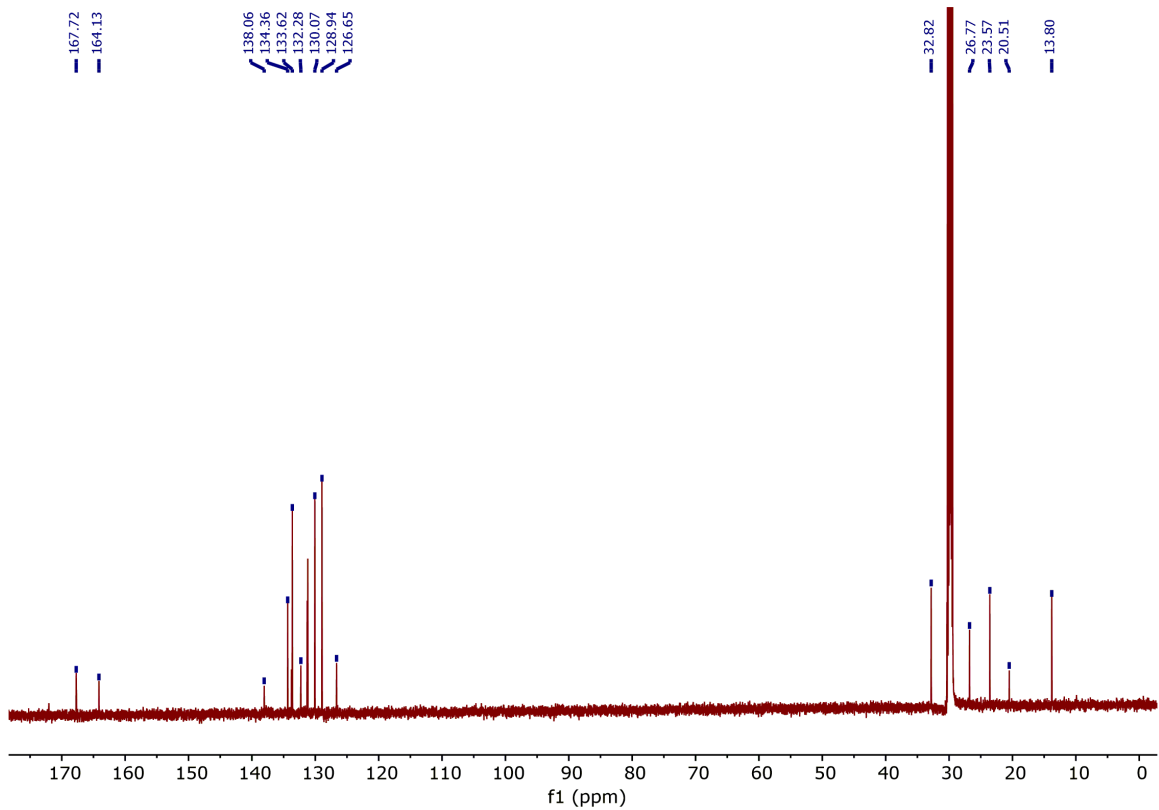

Figure S34.  $^{13}\text{C}\{^1\text{H}\}$  NMR spectrum (acetone- $d_6$ , 150.90 MHz, 20 °C) of **10**

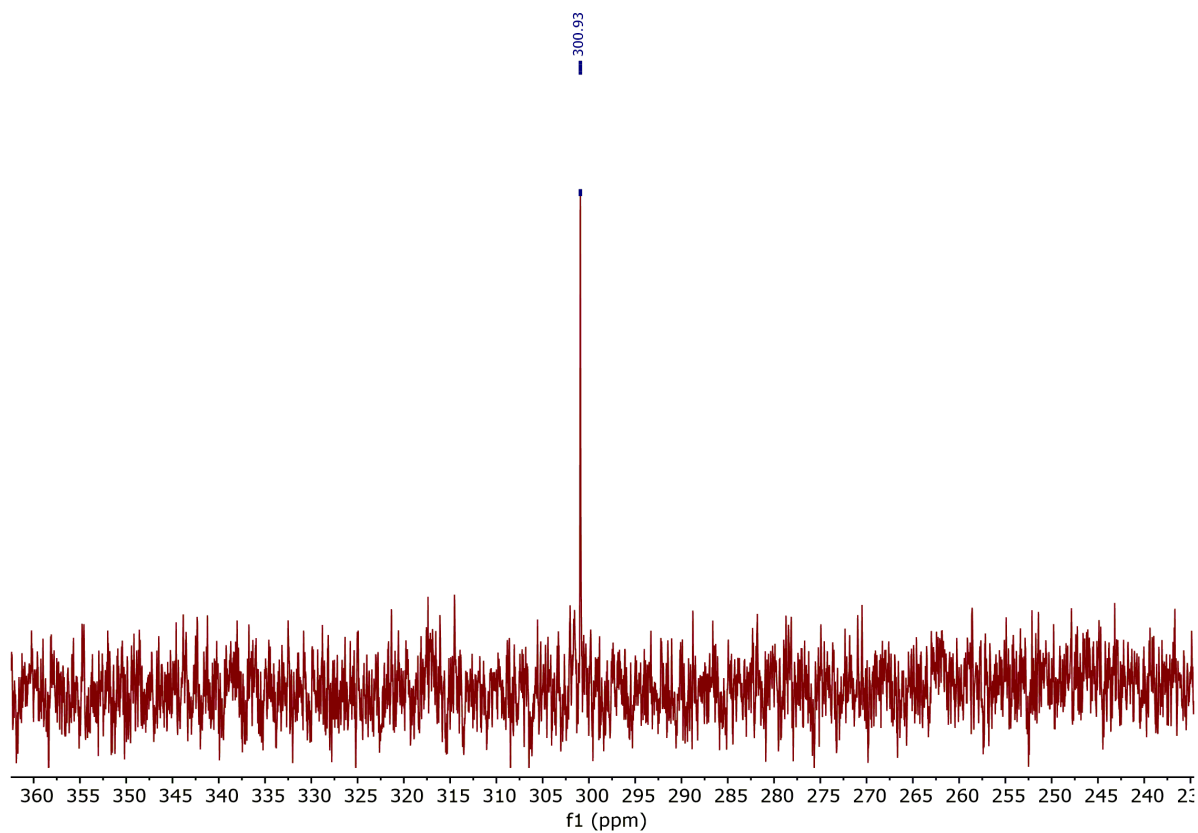

**Figure S35.**  $^{77}\text{Se}\{^1\text{H}\}$  NMR spectrum (acetone- $d_6$ , 114.45 MHz, 20 °C) of **10**

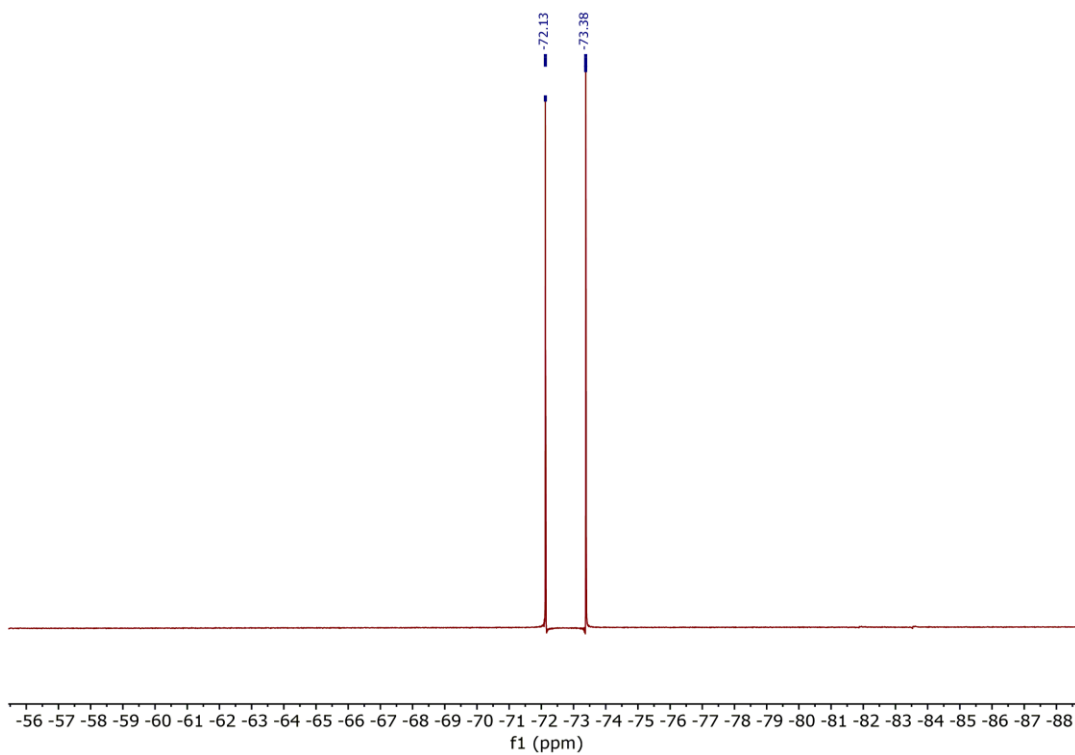

**Figure S36.**  $^{19}\text{F}\{^1\text{H}\}$  NMR spectrum (acetone- $d_6$ , 564.68 MHz, 20 °C) of **10**

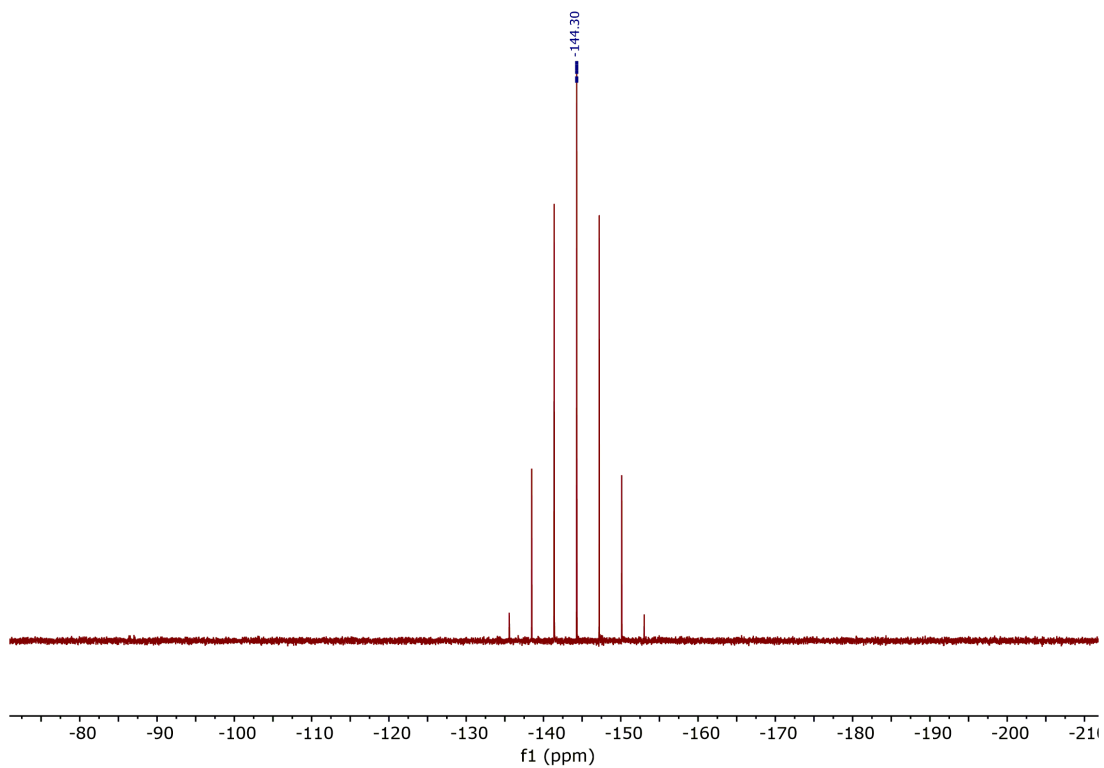

Figure S37.  $^{31}\text{P}\{^1\text{H}\}$  NMR spectrum (acetone- $d_6$ , 242.93 MHz, 20 °C) of **10**

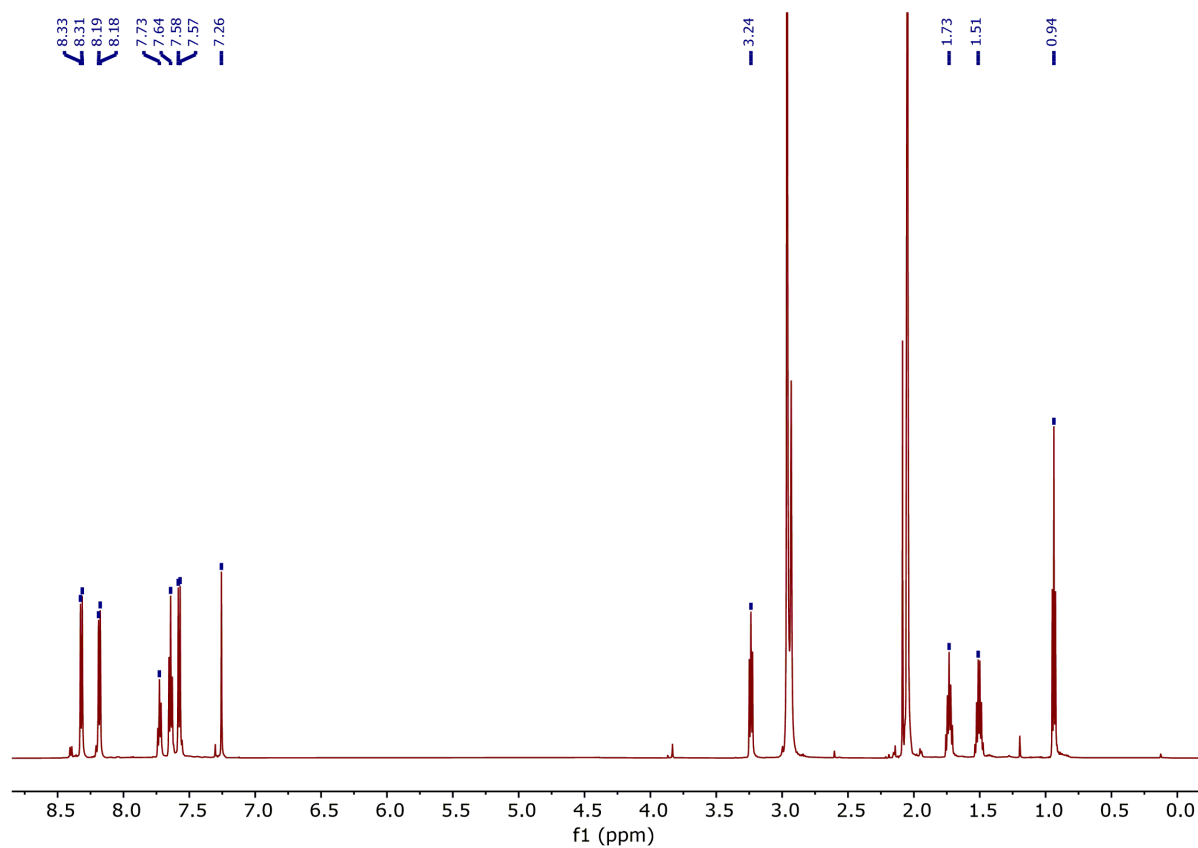

Figure S38.  $^1\text{H}$  NMR spectrum (acetone- $d_6$ , 600.13 MHz, 20 °C) of **11**

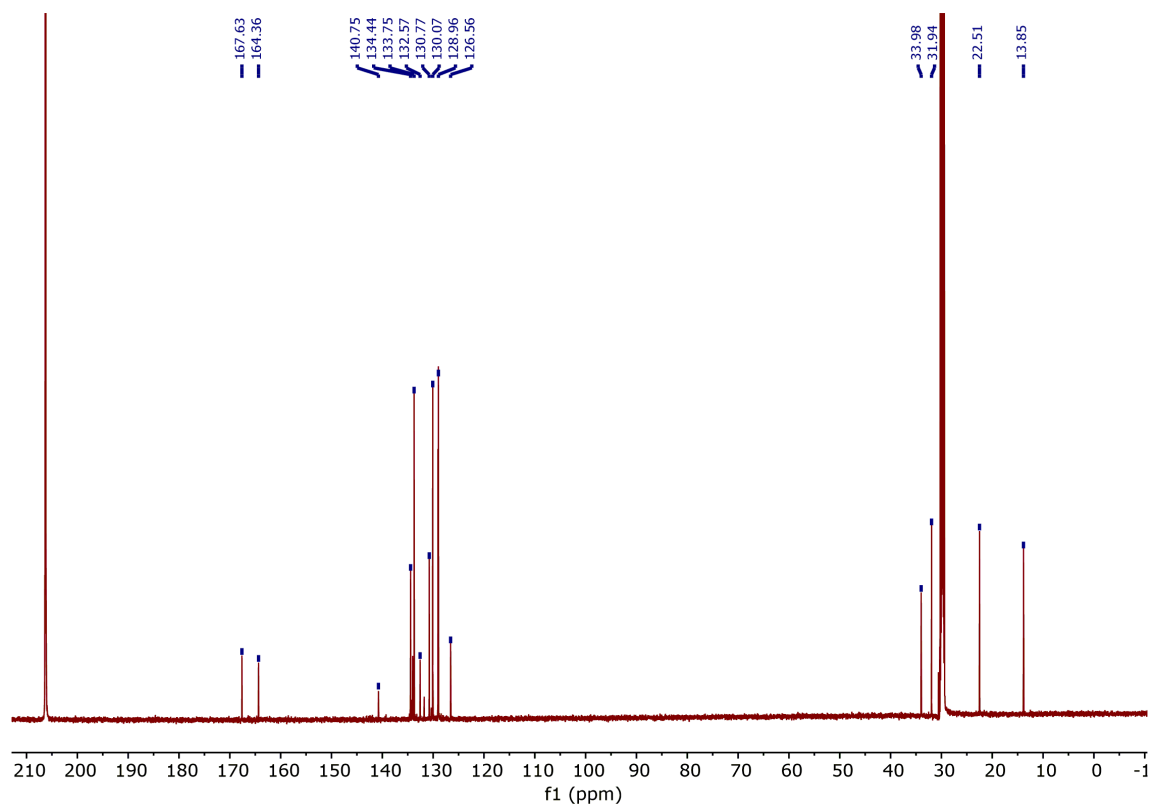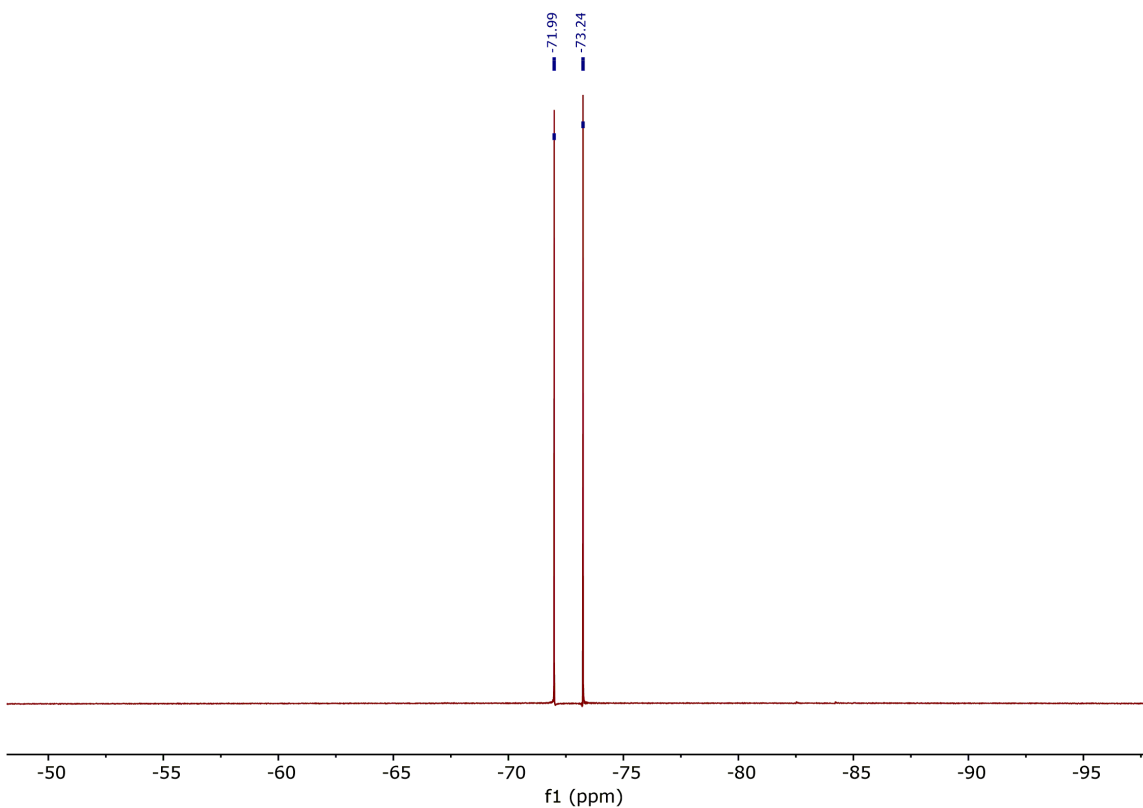

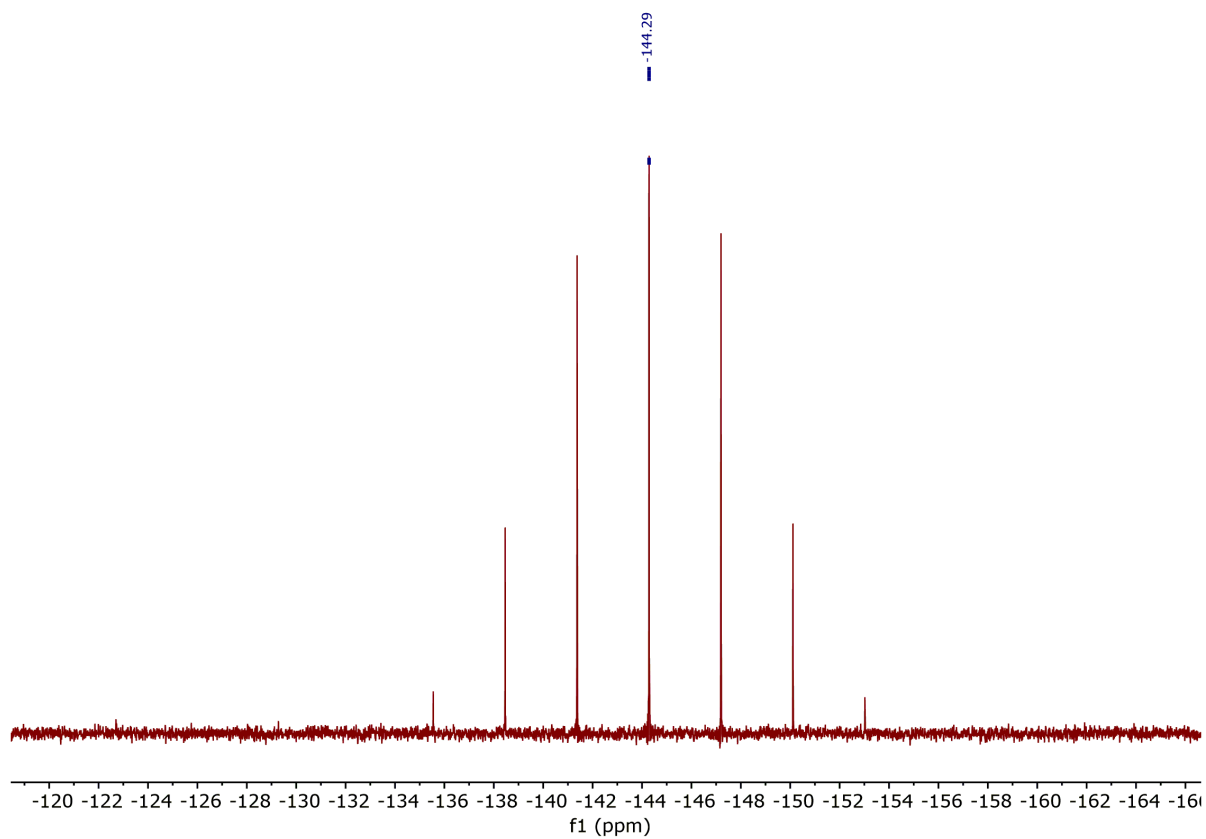

**Figure S41.**  $^{31}\text{P}\{^1\text{H}\}$  NMR spectrum (acetone- $d_6$ , 242.93 MHz, 20 °C) of **11**
